# Supplementary material for: QTL Landscape for Oil Content in Brassica juncea: Analysis in Multiple Bi-Parental Populations in High and “0” Erucic Background
Source: Front Plant Sci. 2018 Oct 16;9:1448. doi: 10.3389/fpls.2018.01448 (PMC6198181; doi:10.3389/fpls.2018.01448)
Supplement: Supplementary file 4 [file Table_4.XLSX]

## Sheet: Sheet1
Supplementary Table 4: The INT map developed by merging the markers of five SE and three ZE population linkage maps and its syntenic segmental alignment with the Arabidopsis genome
									Mapped interval of C-QTL idntified from five SE Populations
									Mapped interval of 'common' QTL identified between SE and ZE populations
Chromosome	Marker name	Position (cM)	Marker Typeᵅ	Homologous locus in Arabidopsis genome	Homologous locus in Brassica rapa genome	Syntenic Block
A01	At4g39350a	0	IP	At4g39350	Bra011865	U		ᵅSource of markers used in the present study (All citations are given in main-text references list)
A01	At4g39010	0.7	IP	At4g39010	Bra011882	U			Marker Systems	References
A01	At4g38470a	0.9	IP	At4g38470	Bra011897	U			IP	Panjabi et al., 2008
A01	At4g39690	1.1	IP	At4g39690	Bra011841	U			Genomic SSR	Kim et al., 2009; Xu et al., 2010; Padmaja et al., 2005
A01	BRMS-037	1.3	Genomic SSR	-	-	-			Genic SSR	Dhaka et al., 2017
A01	BJ_VH_1139	2	SNP	At4g39710	Bra011839	U			SNP	Paritosh et al., 2014
A01	BJ_VH_0218	2.3	SNP	At4g40045	Bra011811	U			AFLP	Pradhan et al., 2003
A01	At4g37280a	4.6	IP	At4g37280	Bra011751	U			RFLP	Pradhan et al., 2003
A01	UGM1799b	4.9	Genic SSR	At4g37490	Bra011769	U
A01	At4g37510	5.3	IP	At4g37510	Bra011770	U
A01	BJ_VH_0215	6.9	SNP	At4g36890	Bra011745	U
A01	UGM2001b	7.1	Genic SSR	At4g36270	Bra011676	U
A01	BJ_VH_0213	7.3	SNP	At4g37000	Bra011734	U
A01	UGM2094	7.4	Genic SSR	At4g36860	Bra011712	U
A01	BJ_VH_0210	7.8	SNP	At4g37200	Bra011719	U
A01	cnu_m504a	7.8	Genomic SSR	At4g37730	Bra011780	U
A01	ec4f1	8	RFLP	-	-	-
A01	nia_m110a	8	Genomic SSR	At4g38950	Bra011885	U
A01	nia_m138a	8.1	Genomic SSR	At4g37780	Bra011785	U
A01	UGM1417	8.3	Genic SSR	At4g36520	Bra011688	U
A01	BJ_VH_0209	8.4	SNP	At4g35910	Bra011714	U
A01	nia_m097a	9.6	Genomic SSR	At4g36550	Bra011690	U
A01	BJ_VH_0208	9.7	SNP	At4g17240	Bra026238	U
A01	nia_m109a	10.3	Genomic SSR	At4g36140	Bra011666	U
A01	BJ_VH_0206	10.5	SNP	At4g36180	Bra011668	U
A01	UGM0762	10.6	Genic SSR	At4g36020	Bra011655	U
A01	e62m33v765	11.1	AFLP	-	-	-
A01	BJ_VH_0204	11.4	SNP	At4g35880	Bra011646	U
A01	nia_m108a	11.4	Genomic SSR	At4g36050	Bra011656	U
A01	BJ_VH_0205	11.5	SNP	At4g35980	Bra011652	U
A01	e34m49d70	11.8	AFLP	-	-	-
A01	nia_m106a	14.9	Genomic SSR	At4g35270	Bra011600	U
A01	nia_m107a	14.9	Genomic SSR	At4g35320	Bra011606	U
A01	BJ_VH_0203	15.1	SNP	At4g35140	Bra011589	U
A01	nia_m071a	17	Genomic SSR	At4g34460	Bra011536	U
A01	BJ_VH_0198	18.1	SNP	At4g20410	Bra013462	U
A01	BJ_VH_0197	18.1	SNP	At4g34220	Bra011508	U
A01	cnu_m142a	18.3	Genomic SSR	At4g34160	Bra011501	U
A01	At4g34140b	18.7	IP	At4g34140	Bra011494	U
A01	nia_m070a	20.7	Genomic SSR	At4g33980	Bra011484	U
A01	At4g34270	21.3	IP	At4g34270	Bra011516	U
A01	e42m32d350	21.7	AFLP	-	-	-
A01	At4g33480	21.8	IP	At4g33480	Bra011445	U
A01	BrgMS3210a	25.3	Genomic SSR	-	-	-
A01	At4g31720b	27.4	IP	At4g31720	Bra011293	U
A01	At4g35270	27.7	IP	At4g35270	Bra011295	U
A01	BJ_VH_0191	29.5	SNP	At4g30900	Bra011231	U
A01	UGM0715	30.7	Genic SSR	At4g34215	Bra011507	U
A01	e45t66v714	30.8	AFLP	-	-	-
A01	BJ_VH_0190	31.9	SNP	At4g30250	Bra011177	U
A01	At4g30150	32.7	IP	At4g30150	Bra011167	U
A01	p53m33v167	35.3	AFLP	-	-	-
A01	BJ_VH_0245	36.9	SNP	At4g18130	Bra013286	U
A01	BJ_VH_0247	37	SNP	At4g18590	Bra013326	U
A01	At4g18400b	40.4	IP	At4g18400	Bra013306	U
A01	BJ_VH_0249	41.5	SNP	At4g20410	Bra013462	U
A01	e34m50t180	41.6	AFLP	-	-	-
A01	At4g19003a	41.9	IP	At4g19003	Bra013368	U
A01	At4g20150d	42.7	IP	At4g20150	-	U
A01	cnu_m230a	43.1	Genomic SSR	At4g20260	Bra013450	U
A01	p87m38v911	44.3	AFLP	-	-	-
A01	cnu_m238a-1	45.5	Genomic SSR	At4g25230	Bra013876	U
A01	BJ_VH_0254	47.2	SNP	At5g02410	-	R
A01	BJ_VH_0256	47.5	SNP	At4g22580	Bra013627	U
A01	At4g23860b	48.1	IP	At4g23860	Bra013737	U
A01	BJ_VH_0252	48.2	SNP	At4g21350	Bra013521	U
A01	BJ_VH_0255	48.3	SNP	At4g22260	Bra013604	U
A01	UGM1688	48.4	Genic SSR	At4g20880	Bra013480	U
A01	e44m50t130	48.8	AFLP	-	-	-
A01	UGM0438	49	Genic SSR	At4g31710	-	U
A01	p79t78t270	49.2	AFLP	-	-	-
A01	At4g23100b	49.3	IP	At4g23100	Bra013675	U
A01	nia_m085a	49.4	Genomic SSR	At4g23690	Bra013723	U
A01	e34m50d120	49.5	AFLP	-	-	-
A01	cnu_m467a	50	Genomic SSR	-	-	-
A01	BrgMS298	51.3	Genomic SSR	-	Bra013763	U
A01	BJ_VH_0259	51.7	SNP	At4g24510	Bra013809	U
A01	BJ_VH_0262	53.5	SNP	At4g24800	Bra013836	U
A01	p32t77d200	53.7	AFLP	-	-	-
A01	At4g24160	54	IP	At4g24160	Bra013770	U
A01	UGM0507a	54	Genic SSR	At4g31840	Bra011303	U
A01	BJ_VH_0266	54.4	SNP	At4g26130	Bra013955	U
A01	e62t75v282	54.6	AFLP	-	-	-
A01	BJ_VH_0361	55.3	SNP	At4g26790	Bra026402	U
A01	e60t65d399	55.4	AFLP	-	-	-
A01	At4G28290	55.4	IP	At4g28290	Bra026269	U
A01	UGM0102	56	Genic SSR	At4g28170	Bra026278	U
A01	BJ_VH_0357	56.7	SNP	At4g28100	Bra026282	U
A01	UGM1456	56.8	Genic SSR	At4g27430	Bra026351	U
A01	BJ_VH_0352	57	SNP	At4g17410	Bra026248	U
A01	BJ_VH_0360	57	SNP	At4g25070	Bra013860	U
A01	UGM1300b	57	Genic SSR	At4g27870	Bra026301	U
A01	BJ_VH_0355	57	SNP	At1g20100	-	B
A01	BJ_VH_0353	57	SNP	At1g22860	-	B
A01	BJ_VH_1138	57.1	SNP	At4g27700	Bra026314	U
A01	At4G28820	57.5	IP	At4g28820	Bra011063	U
A01	Na14-g06a	57.6	Genomic SSR	-	-	-
A01	nia_m119a-1	58.6	Genomic SSR	-	-	-
A01	At4g16840a	58.7	IP	At4g16840	-	U
A01	BJ_VH_0459	58.8	SNP	-	-	-
A01	BJ_VH_0466	58.8	SNP	At4g35630	-	U
A01	BJ_VH_0852	58.8	SNP	At4g16580	Bra038489	U
A01	BJ_VH_0295	58.8	SNP	At2g27580	-	I
A01	BJ_VH_0460	58.8	SNP	-	-	-
A01	UGM1785	59.4	Genic SSR	-	-	-
A01	Ra2-E04	59.9	Genomic SSR	-	-	-
A01	At4g17050c	60	IP	At4g17050	Bra040109	U
A01	UGM2275	60.1	Genic SSR	-	-	-
A01	At4g17010	60.1	IP	At4g17010	Bra040105	U
A01	BrgMS7	60.6	Genomic SSR	-	-	-
A01	At3g51610	61.1	IP	At3g51610	Bra038909	N
A01	BJ_VH_0443	61.2	SNP	-	-	-
A01	p58t83t77	61.3	AFLP	-	-	-
A01	BJ_VH_0458	61.3	SNP	-	-	-
A01	BJ_VH_0438	61.4	SNP	-	-	-
A01	At4g15520a	61.4	IP	At4g15520	Bra039541	T
A01	e48t78h230	61.4	AFLP	-	-	-
A01	e44m38v452	61.4	AFLP	-	-	-
A01	At4g14710	61.4	IP	At4g14710	Bra036884	T
A01	At4g15790	61.4	IP	At4g15790	Bra033514	T
A01	e31m61t60	61.4	AFLP	-	-	-
A01	e62t65d500	61.4	AFLP	-	-	-
A01	e62t65d170	61.4	AFLP	-	-	-
A01	e54t71d108	61.4	AFLP	-	-	-
A01	BJ_VH_0433	61.5	SNP	At4g14605	Bra036876	T
A01	BJ_VH_0439	61.6	SNP	-	-	-
A01	At1g54990	61.6	IP	At1g54990	Bra031432	D
A01	e34m62t130	61.6	AFLP	-	-	-
A01	BJ_VH_0436	61.8	SNP	-	-	-
A01	BJ_VH_0461	62.3	SNP	-	-	-
A01	At3g50430	62.3	IP	At3g50430	Bra030011	M
A01	p63t71d130	63	AFLP	-	-	-
A01	e45m34t400	63.5	AFLP	-	-	-
A01	e55t63v285	63.7	AFLP	-	-	-
A01	e31m61h98	63.9	AFLP	-	-	-
A01	e31m61h328	63.9	AFLP	-	-	-
A01	e31m49h97	63.9	AFLP	-	-	-
A01	e54t69h430	63.9	AFLP	-	-	-
A01	e32t66h158	63.9	AFLP	-	-	-
A01	At1g58220b	63.9	IP	At1g58220	Bra035458	D
A01	At1g57680b	63.9	IP	At1g57680	Bra035471	D
A01	e51t78v344	63.9	AFLP	-	-	-
A01	e44m38h370	64	AFLP	-	-	-
A01	e34m50h102	64	AFLP	-	-	-
A01	BJ_VH_0645	64	SNP	At3g49750	Bra029968	M
A01	At3g48540b	64	IP	At3g48540	Bra029903	M
A01	At3g44880	64.1	IP	At3g44880	Bra037607	M
A01	BJ_VH_0630	64.1	SNP	-	-	-
A01	BJ_VH_0644	64.2	SNP	At3g48560	Bra029906	M
A01	BJ_EJ_0070	64.2	SNP	At3g44880	Bra037607	M
A01	BJ_VH_0636	64.2	SNP	At1g58025	Bra035468	D
A01	BJ_VH_0632	64.3	SNP	-	-	-
A01	At3g44735a	64.3	IP	At3g44735	-	M
A01	BJ_VH_0633	64.4	SNP	At1g61040	Bra031459	D
A01	UGM1510	64.5	Genic SSR	At3g44820	Bra037606	M
A01	BrgMS434a	64.7	Genomic SSR	-	-	-
A01	ec5a1	64.8	RFLP	-	-	-
A01	UGM0613	65	Genic SSR	At1g49140	Bra029935	M
A01	UGM1547	65	Genic SSR	-	-	-
A01	UGM0850	65	Genic SSR	-	-	-
A01	BrgMS524b	65.3	Genomic SSR	-	Bra033823	M
A01	UGM1498	65.4	Genic SSR	At1g59910	Bra035415	D
A01	BrgMS471b	65.6	Genomic SSR	-	-	-
A01	UGM0883	65.7	Genic SSR	At3g51620	Bra038910	N
A01	BrgMS132c	66	Genomic SSR	At3g48195	Bra033763	M
A01	UGM1664	67.5	Genic SSR	-	-	-
A01	cnu_m536a	67.9	Genomic SSR	At3g20050	Bra038252	F
A01	At3g22240	69	IP	At3g22240	Bra023842	F
A01	BJ_VH_0641	69.1	SNP	At3g23100	Bra023763	F
A01	UGM1446	69.2	Genic SSR	At3g22880	Bra023796	F
A01	e47t74d400	70.6	AFLP	-	-	-
A01	At3g20320a	71.1	IP	At3g20320	Bra038262	F
A01	e45m34v162	71.7	AFLP	-	-	-
A01	UGM0635	73.2	Genic SSR	At3g17460	Bra021249	F
A01	BJ_VH_0640	74.1	SNP	At3g17090	Bra021218	F
A01	BJ_VH_0639	74.4	SNP	At3g16840	Bra021205	F
A01	At3g16760a	74.5	IP	At3g16760	Bra021199	F
A01	BJ_VH_0638	75	SNP	At3g15900	Bra021144	F
A01	UGM0016	77.3	Genic SSR	At3g16640	Bra021187	F
A01	e47t74v450	78.2	AFLP	-	-	-
A01	cnu_m214a-1	81.6	Genomic SSR	-	Bra021543	F
A01	e42m32h125	84.6	AFLP	-	-	-
A01	BJ_VH_0643	86.8	SNP	At3g12570	Bra038733	F
A01	UGM0680	88	Genic SSR	At3g11510	-	F
A01	At3g11150	88.3	IP	At3g11150	Bra034167	F
A01	At3g24495	88.3	IP	At3g24495	Bra028373	F
A01	UGM2261	88.7	Genic SSR	At3g11100	Bra034165	F
A01	At3g10810	89.1	IP	At3g10810	Bra034148	F
A01	UGM2164	91.7	Genic SSR	At3g07790	-	F
A01	At3g01250	91.9	IP	At3g01250	Bra040504	F
A01	At3g09200	92	IP	At3g09200	Bra034055	F
A01	e54t69v150	92.4	AFLP	-	-	-
A01	At3g08690a	92.4	IP	At3g08690	-	F
A01	At3g07310b	92.4	IP	At3g07310	Bra040372	F
A01	e44m50d380	93.7	AFLP	-	-	-
A01	Na14-F11	94.7	Genomic SSR	-	-	-
A01	nia_m128a-1	95.2	Genomic SSR	-	-	-
A01	e54t71d105	95.8	AFLP	-	-	-
A01	BJ_VH_0468	97.1	SNP	-	Bra040366	F
A01	p65m32v312	97.9	AFLP	-	-	-
A01	UGM0186	98.6	Genic SSR	At3g05980	Bra040239	F
A01	At5g26360b	98.9	IP	At5g26360	Bra040242	F
A01	BJ_VH_0467	98.9	SNP	At3g06180	Bra040232	F
A01	BJ_VH_0939	100.1	SNP	At3g03630	Bra036448	F
A01	UGM0491	100.3	Genic SSR	At3g03740	Bra036437	F
A01	wg1h4b	100.9	RFLP	-	-	-
A01	UGM2081b	101.5	Genic SSR	At3g02250	Bra021472	F
A01	At3g02420a	102	IP	At3g02420	Bra021462	F
A01	At3g01060	103.5	IP	At3g01060	Bra021480	F
A01	At3g07950	105.3	IP	At3g07950	Bra040042	F
A01	e44m50h360	107.7	AFLP	-	-	-
A01	e43m50h155	108.8	AFLP	-	-	-
A01	e46m59h255	112.4	AFLP	-	-	-
A02	cnu_m616a	0	Genomic SSR	At5g12420	Bra023377	R
A02	p58m71h154	4.4	AFLP	-	-	-
A02	BrgMS498a	6.3	Genomic SSR	At5g13180	Bra023395	R
A02	p48t67v280	7	AFLP	-	-	-
A02	nia_m006a	8.3	Genomic SSR	At5g08300	Bra028665	R
A02	e31m50t345	8.5	AFLP	-	-	-
A02	UGM0074	9.6	Genic SSR	At5g07960	-	R
A02	At5g04920a	10.8	IP	At5g04920	-	R
A02	At5g08280a	11.1	IP	At5g08280	Bra028666	R
A02	nia_m025a	12	Genomic SSR	At5g08300	Bra028665	R
A02	At5g05920b	12.2	IP	At5g05920	-	R
A02	At5g10780a	12.6	IP	At5g10780	Bra028567	R
A02	UGM0710	13.1	Genic SSR	At5g11260	Bra023317	R
A02	BJ_VH_0682	13.4	SNP	At5g11600	Bra023333	R
A02	cnu_m389a	14.9	Genomic SSR	At5g17430	Bra023617	R
A02	At5g11640	15	IP	At5g11640	Bra023335	R
A02	BJ_VH_0329	16.4	SNP	At5g13770	Bra023434	R
A02	At5g13190a	16.5	IP	At5g13190	Bra023396	R
A02	BJ_VH_0684	16.5	SNP	At5g13400	Bra023408	R
A02	At5g12290	16.8	IP	At5g12290	Bra023371	R
A02	At5g14720	17.2	IP	At5g14720	Bra023483	R
A02	At5g15540	17.7	IP	At5g15540	Bra023522	R
A02	At5g14850	17.8	IP	At5g14850	Bra023489	R
A02	At5g14790	18	IP	At5g14790	Bra023488	R
A02	At5g15930	18.2	IP	At5g15930	Bra023546	R
A02	At5g15280a	18.3	IP	At5g15280	Bra023514	R
A02	At5g15680a	18.4	IP	At5g15680	Bra023532	R
A02	At5g16010	18.4	IP	At5g16010	Bra023548	R
A02	UGM1364	18.5	Genic SSR	At5g15600	Bra023527	R
A02	UGM1618	18.6	Genic SSR	At5g15720	Bra023534	R
A02	At5g15860b	18.7	IP	At5g15860	Bra023542	R
A02	At5g16170a	18.7	IP	At5g16170	-	R
A02	At5g16260	19	IP	At5g16260	-	R
A02	At5g16400	19	IP	At5g16400	Bra023564	R
A02	At5g16550	19	IP	At5g16550	Bra023572	R
A02	At5g16400a	19	IP	At5g16400	Bra023564	R
A02	Bra023563-AA	19.2	SNP	At5g16390	Bra023563	R
A02	At5g16390-023563a	19.4	IP	At5g16390	Bra023563	R
A02	At5g17300	19.6	IP	At5g17300	Bra023610	R
A02	At5g16750	19.7	IP	At5g16750	Bra023582	R
A02	At5g16700	20.1	IP	At5g16700	-	R
A02	At5g20180c	20.2	IP	At5g20180	Bra020089	R
A02	e31m42v225	20.5	AFLP	-	-	-
A02	At5g16820	20.8	IP	At5g16820	Bra023584	R
A02	nia_m143a-1	21.8	Genomic SSR	At5g20700	Bra020123	R
A02	p63t71t150	22.9	AFLP	-	-	-
A02	At5g18640	23.7	IP	At5g18640	-	R
A02	UGM0816b	25.8	Genic SSR	At5g19510	Bra020043	R
A02	nia_m142a	27.1	Genomic SSR	At5g20790	Bra020126	R
A02	At5g19510a	27.3	IP	At5g19510	Bra020043	R
A02	At5g19150a	27.4	IP	At5g19150	Bra023708	R
A02	UGM0767	27.7	Genic SSR	At5g19860	Bra020068	R
A02	At5g20010a	28.7	IP	At5g20010	-	R
A02	BrgMS37b	29.4	Genomic SSR	-	-	-
A02	e31m61d145	29.7	AFLP	-	-	-
A02	BrgMS369	30.1	Genomic SSR	-	-	-
A02	UGM0537b	30.3	Genic SSR	At5g21170	Bra020154	R
A02	BJ_VH_0302	30.3	SNP	At5g22400	Bra020190	R
A02	BJ_VH_0679	30.3	SNP	At5g22800	Bra020215	R
A02	BJ_VH_0676	30.3	SNP	At5g22840	Bra020218	R
A02	UGM0536	30.3	Genic SSR	At5g59830	Bra020283	W
A02	e46t65h723	30.6	AFLP	-	-	-
A02	BrgMS627	30.7	Genomic SSR	At5g58800	Bra020352	W
A02	UGM1106	31.4	Genic SSR	At5g60200	Bra020261	W
A02	UGM0739	31.4	Genic SSR	At5g60640	Bra020239	W
A02	BrgMS1375	33.2	Genomic SSR	At5g56460	Bra035622	W
A02	e44m38h212	33.6	AFLP	-	-	-
A02	UGM1374	33.8	Genic SSR	At5g57120	Bra035650	W
A02	e44m38t211	34.1	AFLP	-	-	-
A02	BrgMS4465	34.3	Genomic SSR	At5g52300	Bra022585	W
A02	BJ_VH_0626	34.4	SNP	At5g57870	Bra020407	W
A02	BJ_VH_0697	34.6	SNP	At5g57870	Bra020407	W
A02	BrgMS177	35.7	Genomic SSR	At5g51220	Bra022540	W
A02	At5G55160	36.4	IP	At5g55160	Bra035560	W
A02	At5g53920	36.6	IP	At5g53920	Bra022682	W
A02	BJ_VH_0702	36.9	SNP	At5g53310	Bra022646	W
A02	At5g53560	36.9	IP	At5g53560	Bra022660	W
A02	BrgMS429	37.1	Genomic SSR	-	Bra022584	W
A02	BJ_VH_0628	37.2	SNP	At5g55520	Bra035576	W
A02	At5g52980	38.4	IP	At5g52980	-	W
A02	At5g52920	38.4	IP	At5g52920	Bra022618	W
A02	BrgMS622	38.9	Genomic SSR	At5g52060	Bra022577	W
A02	BJ_VH_0700	40.1	SNP	At5g52410	Bra022589	W
A02	e51t78v89	40.3	AFLP	-	-	-
A02	p62t78v278	40.6	AFLP	-	-	-
A02	BJ_VH_0667	41.3	SNP	At1g65380	Bra022482	E
A02	At1g67060	41.4	IP	At1g67060	Bra034031	E
A02	At1g65440	41.4	IP	At1g65440	Bra022478	E
A02	e39m32d120	41.5	AFLP	-	-	-
A02	BrgMS397	41.7	Genomic SSR	At1g68430	Bra033936	E
A02	BrgMS779	42	Genomic SSR	At1g66250	Bra039757	E
A02	BJ_VH_0669	42	SNP	At1g67050	Bra034033	E
A02	At1g67170b	42.3	IP	At1g67170	Bra034018	E
A02	cnu_m036a	42.8	Genomic SSR	At1g69040	Bra038330	E
A02	cnu_m424a-2	43	Genomic SSR	-	-	-
A02	p53t82t350	43.3	AFLP	-	-	-
A02	UGM0060	44.2	Genic SSR	At1g68490	Bra033929	E
A02	BJ_VH_0668	44.8	SNP	At1g67530	Bra033994	E
A02	At1g67550	44.8	IP	At1g67550	Bra033992	E
A02	At1g68040	45.2	IP	At1g68040	Bra033964	E
A02	e31m62d103	45.8	AFLP	-	-	-
A02	UGM1819	45.9	Genic SSR	At1g68790	Bra038353	E
A02	At1g68310c	46.4	IP	At1g68310	Bra033949	E
A02	At1g68370c	47.1	IP	At1g68370	Bra033942	E
A02	BJ_VH_0670	47.1	SNP	At1g69030	Bra038331	E
A02	BJ_VH_0455	47.2	SNP	-	-	-
A02	UGM1965	47.3	Genic SSR	At1g69420	Bra038305	E
A02	BJ_VH_0656	48.6	SNP	At1g70330	Bra007911	E
A02	e39m32d145	49.1	AFLP	-	-	-
A02	At1g69390	49.2	IP	At1g69390	Bra038308	E
A02	At1g70350	49.2	IP	At1g70350	-	E
A02	e31m62d470	49.2	AFLP	-	-	-
A02	At1g70700	49.5	IP	At1g70700	Bra007937	E
A02	At1g72020	49.8	IP	At1g72020	Bra008002	E
A02	BJ_VH_0658	49.9	SNP	At1g71170	Bra007967	E
A02	At1g71950	49.9	IP	At1g71950	Bra007998	E
A02	p48t94t337	50.2	AFLP	-	-	-
A02	e44m50t360	50.3	AFLP	-	-	-
A02	At1g72710	50.5	IP	At1g72710	Bra008043	E
A02	UGM0092	50.6	Genic SSR	At1g72750	Bra008046	E
A02	At1g72970b	50.8	IP	At1g72970	Bra008061	E
A02	At1g72890	50.9	IP	At1g72890	Bra008060	E
A02	At1g72740a	50.9	IP	At1g72740	-	E
A02	At1g72390a	50.9	IP	At1g72390	Bra008031	E
A02	At1g73090	51.5	IP	At1g73090	Bra008070	E
A02	p48t94v336	51.7	AFLP	-	-	-
A02	UGM0053	52	Genic SSR	At1g74520	Bra008156	E
A02	UGM0118	52.2	Genic SSR	At1g73230	Bra008086	E
A02	At1g73030	52.3	IP	At1g73030	Bra008067	E
A02	BJ_VH_0661	52.6	SNP	At1g73930	Bra008116	E
A02	At1g73410	52.7	IP	At1g73410	Bra008096	E
A02	At1g74640	53	IP	At1g74640	Bra008159	E
A02	At1g74650	53.2	IP	At1g74650	Bra008160	E
A02	At1g75840	53.2	IP	At1g75840	Bra008227	E
A02	BJ_VH_0662	53.6	SNP	At1g76570	Bra008265	E
A02	At1g76200c	53.6	IP	At1g76200	-	E
A02	BJ_VH_0664	54	SNP	At1g77680	Bra008322	E
A02	UGM1933	54.7	Genic SSR	At1g78882	-	E
A02	BrgMS558	54.8	Genomic SSR	At5g20650	Bra020119	E
A02	UGM1076	55	Genic SSR	At1g78882	-	E
A02	e31m62t125	55	AFLP	-	-	-
A02	At1g78580	55.5	IP	At1g78580	Bra008366	E
A02	UGM1574	55.6	Genic SSR	At1g80870	Bra008433	E
A02	e39m32t150	55.7	AFLP	-	-	-
A02	e48t78d155	55.7	AFLP	-	-	-
A02	e42m32d230	55.7	AFLP	-	-	-
A02	e34m49d95	55.8	AFLP	-	-	-
A02	e62t75t272	55.8	AFLP	-	-	-
A02	p53t91t280	55.8	AFLP	-	-	-
A02	e31m50d75	55.8	AFLP	-	-	-
A02	At1g78810	55.8	IP	At1g78810	Bra008380	E
A02	e35t63v301	56.1	AFLP	-	-	-
A02	BJ_VH_0652	57	SNP	At1g80860	Bra008434	E
A02	UGM1305a	57.7	Genic SSR	At1g74230	Bra008142	E
A02	BrgMS180	58	Genomic SSR	-	-	-
A02	At4g02425	58.2	IP	At4g02425	Bra018551	O
A02	BJ_VH_0675	58.9	SNP	At4g10330	Bra033187	P
A02	At4g11790a	58.9	IP	At4g11790	Bra033128	P
A02	BJ_VH_0801	58.9	SNP	At4g12280	-	P
A02	BJ_VH_1130	58.9	SNP	At5g43500	-	V
A02	UGM1563	59	Genic SSR	-	-	-
A02	At1g65840	59.3	IP	At1g65840	Bra039742	E
A02	Ra2-g04	59.6	Genomic SSR	-	-	-
A02	BJ_VH_0695	59.8	SNP	At5g45900	Bra021999	V
A02	e54t71v302	60.2	AFLP	-	-	-
A02	e32t66v261	60.2	AFLP	-	-	-
A02	e35t63v226	60.3	AFLP	-	-	-
A02	e42m32v232	60.3	AFLP	-	-	-
A02	e31m58h202	60.5	AFLP	-	-	-
A02	e31m62h325	60.5	AFLP	-	-	-
A02	e50t66v94	60.9	AFLP	-	-	-
A02	UGM0434	61.4	Genic SSR	-	-	-
A02	BJ_VH_0696	61.6	SNP	At5g47090	Bra022102	V
A02	e47t71v132	61.8	AFLP	-	-	-
A02	e51t78v378	61.9	AFLP	-	-	-
A02	UGM0319	62	Genic SSR	At5g45500	Bra021981	V
A02	e31m61h94	62	AFLP	-	-	-
A02	At5g47030	62.1	IP	At5g47030	Bra022092	V
A02	BJ_VH_0673	62.3	SNP	At2g02400	Bra026600	K
A02	At2g01400a	62.4	IP	At2g01400	Bra026670	K
A02	UGM0400	62.4	Genic SSR	-	-	-
A02	BJ_VH_0619	62.6	SNP	At2g01710	Bra026639	K
A02	ec2c12	62.7	RFLP	-	-	-
A02	At2g01640	62.8	IP	At2g01640	Bra026643	K
A02	e31m49h310	62.8	AFLP	-	-	-
A02	UGM1893	63.5	Genic SSR	At2g01100	-	K
A02	BJ_VH_0622	66.8	SNP	At3g26380	Bra032931	L
A02	e51t78t200	67.2	AFLP	-	-	-
A02	p63t78d112	69.5	AFLP	-	-	-
A02	UGM0428b	69.6	Genic SSR	At3g26910	Bra032961	L
A02	p80m48v270	70.7	AFLP	-	-	-
A02	e43m50v152	71.5	AFLP	-	-	-
A02	p58t68d73	71.5	AFLP	-	-	-
A02	BrgMS753a	72.2	Genomic SSR	-	-	-
A02	cnu_m047a	72.3	Genomic SSR	-	-	-
A02	At4g09900	74	IP	At4g09900	-	P
A02	BJ_VH_00048	76.9	SNP	At5g28530	Bra020611	Q
A02	At5g27450a	77.3	IP	At5g27450	Bra020589	Q
A02	UGM0145	77.6	Genic SSR	-	Bra020633	W
A02	UGM1056	78.5	Genic SSR	At5g48385	Bra020704	W
A02	UGM0743	78.5	Genic SSR	At5g49020	Bra020667	W
A02	At5g26990	79.4	IP	At5g26990	Bra020566	Q
A02	At5g27740b	79.6	IP	At5g27740	Bra020577	Q
A02	BJ_VH_00046	80	SNP	At5g26820	Bra020559	Q
A02	p33t83h171	80	AFLP	-	-	-
A02	At5g26210a	81.7	IP	At5g26210	Bra020543	Q
A02	cnu_m424a-1	82.5	Genomic SSR	-	-	-
A02	At5g25940	83.1	IP	At5g25940	Bra020519	Q
A02	At5g25610a	83.4	IP	At5g25610	Bra020508	Q
A02	BJ_VH_00045	83.8	SNP	At5g25640	Bra020510	Q
A02	At5g25265a	85.8	IP	At5g25265	Bra020495	Q
A02	At5g24970	85.9	IP	At5g24970	Bra020480	Q
A02	BrgMS126b	86	Genomic SSR	At5g23740	Bra029381	Q
A02	BJ_VH_00064	87.4	SNP	At5g24450	Bra029406	Q
A02	BrgMS582	87.8	Genomic SSR	At5g23480	Bra029374	Q
A02	BJ_VH_0655	88.3	SNP	-	-	-
A02	BJ_VH_0378	88.4	SNP	At5g23010	Bra029356	Q
A02	At5g23020a	88.4	IP	At5g23020	Bra029356	Q
A02	BJ_VH_00063	88.6	SNP	At5g23210	Bra029363	Q
A02	UGM1680	88.7	Genic SSR	At5g61150	Bra029332	X
A02	At5g61970	89.1	IP	At5g61970	Bra029296	X
A02	UGM0137	89.3	Genic SSR	At5g62290	Bra029268	X
A02	UGM1141	89.7	Genic SSR	At5g63370	Bra029230	X
A02	Na12-A07	91	Genomic SSR	-	-	-
A02	BJ_VH_00061	91.3	SNP	At5g63280	Bra029232	X
A02	BJ_VH_00062	91.3	SNP	At5g62090	Bra029289	X
A02	At5g63520	91.4	IP	At5g63520	Bra029216	X
A02	BrgMS4481	92	Genomic SSR	At5g65410	Bra031859	X
A02	BrgMS321	92.1	Genomic SSR	At5g65290	Bra031868	X
A02	UGM0618	92.6	Genic SSR	At5g63370	Bra029230	X
A02	BrgMS412	93	Genomic SSR	At5g64360	Bra031921	X
A02	BrgMS11a	93.1	Genomic SSR	At5g64020	Bra031939	X
A02	BrgMS363	93.7	Genomic SSR	At5g66730	Bra031820	X
A02	BJ_VH_00069	93.7	SNP	At5g64680	Bra031909	X
A02	BrgMS790	93.7	Genomic SSR	-	Bra031919	X
A02	BJ_VH_1171	93.8	SNP	At5g65205	Bra031874	X
A02	BrgMS827	93.8	Genomic SSR	At5g65310	Bra031866	X
A02	BJ_VH_1170	93.8	SNP	At5g64740	Bra031904	X
A02	e34m43h335	94.2	AFLP	-	-	-
A02	UGM1195	94.6	Genic SSR	At5g62000	Bra029293	X
A02	UGM2024	94.6	Genic SSR	At5g66190	-	X
A02	cnu_m029a-1	95.2	Genomic SSR	-	-	-
A02	At5G60700	98.1	IP	At5g60700	Bra020235	X
A02	UGM1947	100.3	Genic SSR	-	-	-
A03	nia_m115a	0	Genomic SSR	At5g06170	Bra005883	R
A03	nia_m023a	5.8	Genomic SSR	At5g09480	Bra006023	R
A03	BrgMS432	6.7	Genomic SSR	At5g07810	Bra005954	R
A03	cnu_m535a	7.2	Genomic SSR	At5g07410	Bra005934	R
A03	e34m62h290	7.4	AFLP	-	-	-
A03	UGM2060b	9.5	Genic SSR	At5g22790	Bra006636	R
A03	BrgMS765	13.2	Genomic SSR	At5g16520	Bra006360	R
A03	UGM0862	14.5	Genic SSR	At5g14910	Bra006272	R
A03	UGM0163	15.2	Genic SSR	At5g14910	Bra006272	R
A03	BJ_VH_0746	15.4	SNP	At5g14430	Bra006254	R
A03	At5g15320a	15.4	IP	At5g15320	-	R
A03	BJ_VH_0745	15.5	SNP	At5g11840	Bra006121	R
A03	At5g16520	15.7	IP	At5g16520	Bra006360	R
A03	At5g15230b	16.6	IP	At5g15230	Bra006291	R
A03	At5g17560	16.8	IP	At5g17560	Bra006413	R
A03	BrgMS227a	17.6	Genomic SSR	At5g22330	Bra006621	R
A03	BJ_VH_0747	18.4	SNP	At5g16940	Bra006379	R
A03	BJ_VH_0748	18.4	SNP	At5g17600	Bra006415	R
A03	At5g16690	18.7	IP	At5g16690	-	R
A03	At5g17310a	19.3	IP	At5g17310	Bra006395	R
A03	At5g17270b	19.3	IP	At5g17270	Bra006393	R
A03	At5g17000	19.4	IP	At5g17000	Bra006381	R
A03	At5g19350	19.7	IP	At5g19350	Bra006502	R
A03	UGM1862	20.2	Genic SSR	At5g18500	Bra006463	R
A03	At5g18110	20.3	IP	At5g18110	Bra006439	R
A03	At5g19760	20.3	IP	At5g19760	Bra006516	R
A03	At5g18400a	20.4	IP	At5g18400	Bra006456	R
A03	At5g20010b	21.3	IP	At5g20010	Bra006530	R
A03	At5g18800	21.8	IP	At5g18800	Bra006481	R
A03	At5g20130b	22.1	IP	At5g20130	Bra006542	R
A03	At5g20180b	22.2	IP	At5g20180	Bra006546	R
A03	At5G22480	23.2	IP	At5g22480	Bra006628	R
A03	BrgMS642	23.4	Genomic SSR	At5g22270	Bra006617	R
A03	cnu_m326a	23.6	Genomic SSR	-	-	-
A03	UGM1738	24.4	Genic SSR	At5g22790	Bra006636	R
A03	Ra2-E11	24.4	Genomic SSR	-	-	-
A03	At5g22340	24.7	IP	At5g22340	Bra006622	R
A03	BJ_VH_0706	24.8	SNP	At5g22280	Bra006618	R
A03	At5g22920	24.8	IP	At5g22920	Bra006641	R
A03	At5g22950	24.8	IP	At5g22950	Bra006645	R
A03	At5g21274	24.9	IP	At5g21274	Bra006595	R
A03	BrgMS196	28	Genomic SSR	At5g58190	Bra006780	W
A03	BJ_EJ_0027	29	SNP	At5g58520	Bra006762	W
A03	BJ_EJ_0028	29.1	SNP	At5g58260	Bra006777	W
A03	At5G59740	29.1	IP	At5g59740	Bra006695	W
A03	BJ_VH_0755	30.2	SNP	At5g57850	Bra006795	W
A03	BJ_VH_0148	30.2	SNP	At5g58150	Bra006781	W
A03	BrgMS1502	31.3	Genomic SSR	At5g55090	Bra028991	W
A03	BrgMS126a	32.4	Genomic SSR	-	-	-
A03	UGM1013	32.5	Genic SSR	-	-	-
A03	BN12A	33	Genomic SSR	-	-	-
A03	UGM0008	33.1	Genic SSR	At5g51120	Bra029187	W
A03	cnu_m379a	34.6	Genomic SSR	At2g30470	Bra022801	J
A03	UGM0005a	35	Genic SSR	At2g33150	Bra022927	J
A03	BrgMS1578	35.2	Genomic SSR	-	-	-
A03	At2g33120b	35.3	IP	At2g33120	Bra022926	J
A03	nia_m079a	35.5	Genomic SSR	At2g30880	Bra022817	J
A03	UGM1486	35.9	Genic SSR	At2g31840.	Bra022868	J
A03	cnu_m173a	36.4	Genomic SSR	At2g36210	Bra023055	J
A03	At2g34480	36.4	IP	At2g34480	Bra022978	J
A03	UGM0353	37.2	Genic SSR	At2g31840	Bra022868	J
A03	BrgMS543	37.8	Genomic SSR	At2g30590	Bra022808	J
A03	BJ_VH_0731	37.8	SNP	At2g31955	Bra022872	J
A03	At2g35120a	37.8	IP	At2g35120	-	J
A03	e44m50d375	38.4	AFLP	-	-	-
A03	BJ_VH_0732	38.5	SNP	At2g34680	Bra022984	J
A03	e54t71t340	38.8	AFLP	-	-	-
A03	At2g31490b	39.1	IP	At2g31490	Bra022843	J
A03	At2g36305	39.3	IP	At2g36305	Bra023057	J
A03	BRMS-043	39.3	Genomic SSR	-	-	-
A03	At2g36530b	40.1	IP	At2g36530	Bra023072	J
A03	e51t78v325	40.1	AFLP	-	-	-
A03	At2g36930a	40.2	IP	At2g36930	Bra023088	J
A03	BrgMS2969	40.3	Genomic SSR	At2g33720	Bra022951	J
A03	BrgMS8	40.5	Genomic SSR	-	-	-
A03	At2g38880a	40.6	IP	At2g38880	-	J
A03	cnu_m523a	40.7	Genomic SSR	At2g40640	Bra000197	J
A03	At2g39910	41.1	IP	At2g39910	Bra000155	J
A03	At2g40765c	41.1	IP	At2g40765	Bra000204	J
A03	cnu_m290a	41.1	Genomic SSR	At2g40730	Bra000201	J
A03	BrgMS3126	42	Genomic SSR	At2g40980	Bra000213	J
A03	BrgMS3444	42.2	Genomic SSR	At2g41530	Bra000230	J
A03	Ra2-F11	42.6	Genomic SSR	-	-	-
A03	At2g41945	42.9	IP	At2g41945	Bra000246	J
A03	UGM0109	43	Genic SSR	At2g42530	Bra000263	J
A03	At2g42880c	43.6	IP	At2g42880	Bra000277	J
A03	At2g42490a	44.1	IP	At2g42490	Bra000260	J
A03	At2g42780	44.4	IP	At2g42780	Bra000274	J
A03	BrgMS74	45	Genomic SSR	At2g45790	Bra000403	J
A03	UGM1669	45.4	Genic SSR	At2g40640	Bra000197	J
A03	UGM0616a	45.8	Genic SSR	At2g44730	Bra000360	J
A03	p40m82v935	46.4	AFLP	-	-	-
A03	At2g45950	46.5	IP	At2g45950	Bra000407	J
A03	At2g43790a	47	IP	At2g43790	Bra000326	J
A03	UGM0203a	47.2	Genic SSR	At2g43945	Bra000334	J
A03	At2g45790b	47.2	IP	At2g45790	Bra000403	J
A03	BJ_VH_0728	47.2	SNP	At2g45160	Bra000375	J
A03	BrgMS2980	47.2	Genomic SSR	At2g46340	Bra000420	J
A03	At2g43945a	47.3	IP	At2g43945	Bra000334	J
A03	At2g45690a	47.6	IP	At2g45690	Bra000396	J
A03	BrgMS528	47.7	Genomic SSR	At2g45730	Bra000400	J
A03	At2g44065	47.7	IP	At2g44065	-	J
A03	cnu_m384a	47.7	Genomic SSR	At2g44330	Bra000350	J
A03	UGM1391a	47.8	Genic SSR	At2g43710	Bra000321	J
A03	At2g42680a	47.9	IP	At2g42680	Bra000272	J
A03	cnu_m509a	48.3	Genomic SSR	-	-	-
A03	cnu_m357a	48.4	Genomic SSR	At2g27480	Bra000510	I
A03	At3g62860	49.1	IP	At3g62860	-	N
A03	cnu_m466a	49.3	Genomic SSR	At2g28930	Bra000478	I
A03	UGM0522	49.9	Genic SSR	At2g25740	Bra000554	I
A03	At2g28520b	50.5	IP	At2g28520	Bra000490	I
A03	BJ_VH_0727	50.6	SNP	At2g24820	Bra000547	I
A03	BJ_VH_0705	50.6	SNP	-	Bra000567	I
A03	cnu_m548a	50.8	Genomic SSR	At2g27050	Bra000528	I
A03	At2g25740a	50.8	IP	At2g25740	Bra000554	I
A03	At2g26590b	50.9	IP	At2g26590	Bra000537	I
A03	At2g26990	50.9	IP	At2g26990	Bra000529	I
A03	At2g26800	50.9	IP	At2g26800	Bra000534	I
A03	e31m61d340	51.1	AFLP	-	-	-
A03	At2g23390	51.2	IP	At2g23390	-	I
A03	UGM2105	51.2	Genic SSR	At5g49970	Bra000603	W
A03	BJ_VH_1117	51.8	SNP	At5g49660	Bra000592	W
A03	BJ_VH_1165	51.9	SNP	At2g21050	Bra000584	I
A03	BJ_VH_0725	51.9	SNP	At2g20920	Bra000588	I
A03	At2g23090b	52.8	IP	At2g23090	Bra000574	I
A03	At5g50320	52.8	IP	At5g50320	Bra000619	W
A03	BrgMS3120	53.4	Genomic SSR	At5g50310	Bra000617	W
A03	BJ_VH_0741	53.5	SNP	At4g08810	Bra000656	P
A03	BJ_VH_0110	53.9	SNP	At4g08510	Bra000648	P
A03	BJ_VH_0111	53.9	SNP	At4g08460	Bra000646	P
A03	At4g09730b	54	IP	At4g09730	Bra000690	P
A03	BJ_VH_0742	54.1	SNP	At4g09020	Bra000667	P
A03	UGM1418	55.8	Genic SSR	At4g08500	Bra000647	P
A03	e62m32h170	56.8	AFLP	-	-	-
A03	At4g09670	57.2	IP	At4g09670	Bra000688	P
A03	At4g02580b	58.1	IP	At4g02580	Bra000873	O
A03	At4g03280b	58.9	IP	At4g03280	Bra000837	O
A03	e31m61t130	59	AFLP	-	-	-
A03	At4g03050a	60.2	IP	At4g03050	-	O
A03	BJ_VH_0114	60.5	SNP	At4g12230	Bra000766	P
A03	UGM0050	60.9	Genic SSR	At4g12570	Bra000779	P
A03	At4g01897a	61.3	IP	At4g01897	Bra000909	O
A03	BJ_VH_0737	61.7	SNP	At4g02680	Bra000868	O
A03	UGM1748	61.7	Genic SSR	-	-	-
A03	BrgMS2903	61.9	Genomic SSR	At4g03520	Bra000821	O
A03	UGM1506	62.8	Genic SSR	At4g03020	Bra000849	O
A03	BJ_VH_0738	63.5	SNP	At4g01790	Bra000916	O
A03	cnu_m127a	63.6	Genomic SSR	At4g03560	Bra000820	O
A03	UGM0811	65.2	Genic SSR	-	-	-
A03	BJ_VH_0739	66	SNP	At4g00355	Bra000977	O
A03	BJ_VH_0710	66.2	SNP	At3g01860	Bra000984	F
A03	p33m32h332	67	AFLP	-	-	-
A03	At3g03960	67	IP	At3g03960	Bra001094	F
A03	At3g04460	67	IP	At3g04460	Bra001105	F
A03	At3g04950a	67.1	IP	At3g04950	Bra001132	F
A03	UGM1934	67.7	Genic SSR	At3g06760	Bra001214	F
A03	UGM0949	69.4	Genic SSR	At3g06480	Bra001200	F
A03	BrgMS3209	69.5	Genomic SSR	At3g05970	Bra001177	F
A03	BrgMS3210b	69.6	Genomic SSR	At3g06040	Bra001180	F
A03	At3g06483-001201a	70.4	IP	At3g06483	Bra001201	F
A03	BJ_VH_0116	70.5	SNP	-	Bra001226	F
A03	Na14-g10	71.3	Genomic SSR	-	-	-
A03	BJ_VH_1148	71.9	SNP	-	-	-
A03	BJ_VH_0715	71.9	SNP	At3g07330	Bra001246	F
A03	UGM0213a	72.5	Genic SSR	At3g10780	Bra001380	F
A03	wg7a11	75	RFLP	-	-	-
A03	BrgMS932	75.2	Genomic SSR	At3g11020	Bra001386	F
A03	e62t75t105	75.4	AFLP	-	-	-
A03	BJ_VH_0716	75.6	SNP	At3g10330	Bra001354	F
A03	BJ_VH_0818	75.8	SNP	At3g09190	-	F
A03	e39m50h181	76.1	AFLP	-	-	-
A03	At3g10572a	76.2	IP	At3g10572	Bra001369	F
A03	e31m42h238	76.3	AFLP	-	-	-
A03	UGM1927	76.9	Genic SSR	At3g09180	Bra001331	F
A03	UGM2153	77.2	Genic SSR	At3g07810	Bra001267	F
A03	UGM0736	77.4	Genic SSR	At3g07560	Bra001257	F
A03	At3g13120a	77.6	IP	At3g13120	Bra001489	F
A03	UGM0708a	78.8	Genic SSR	At3g12740	Bra001467	F
A03	BJ_VH_0717	78.8	SNP	At3g13860	Bra001524	F
A03	UGM0785b	79.6	Genic SSR	At3g13460	Bra001506	F
A03	cnu_m477a	80	Genomic SSR	At3g13930	Bra001531	F
A03	At3g13330	80.2	IP	At3g13330	Bra001500	F
A03	cnu_m392a	80.3	Genomic SSR	At3g13690	Bra001520	F
A03	cnu_m321a	80.5	Genomic SSR	At3g14610	Bra001560	F
A03	UGM0838	80.7	Genic SSR	At3g13870	Bra001525	F
A03	UGM1815	80.9	Genic SSR	At3g15030	Bra001579	F
A03	cnu_m327a	81.3	Genomic SSR	At3g17800	Bra001683	F
A03	BJ_VH_0718	81.6	SNP	At3g15160	Bra001585	F
A03	cnu_m214a-2	81.7	Genomic SSR	At3g14260	Bra001544	F
A03	At2g34050b	81.9	IP	At2g34050	-	J
A03	At3g16640b	82	IP	At3g16640	Bra001637	F
A03	At3g15190a	82.1	IP	At3g15190	Bra001587	F
A03	At3g17300a	82.1	IP	At3g17300	Bra001658	F
A03	At3G17780	82.2	IP	At3g17780	Bra001681	F
A03	cnu_m324a	82.5	Genomic SSR	At3g15355	Bra001591	F
A03	cnu_m479a	82.5	Genomic SSR	At3g16210	Bra001625	F
A03	Na10-A09	83.6	Genomic SSR	-	-	-
A03	At3g21400	84.8	IP	At3g21400	Bra001828	F
A03	BJ_VH_0721	85.4	SNP	At3g21580	Bra001834	F
A03	p45m43v250	87.2	AFLP	-	-	-
A03	p37t64t198	87.6	AFLP	-	-	-
A03	At3g22960-001896a	87.6	IP	At3g22960	Bra001896	F
A03	cnu_m073a	88.6	Genomic SSR	At3g24460	Bra001949	F
A03	cnu_m215a	89	Genomic SSR	At3g21970	Bra001849	F
A03	p48t67h390	89.4	AFLP	-	-	-
A03	cnu_m099a	89.7	Genomic SSR	At3g19950	Bra001767	F
A03	BrgMS3081	89.9	Genomic SSR	At3g23170	Bra001905	F
A03	BJ_VH_0722	91.1	SNP	At3g24660	Bra013247	F
A03	UGM0393a	91.3	Genic SSR	At3g24800	Bra013241	F
A03	BJ_EJ_0007	91.3	SNP	-	-	-
A03	At3g24315b	91.3	IP	At3g24315	Bra001943	F
A03	BJ_VH_1156	91.4	SNP	-	-	-
A03	UGM1717	91.5	Genic SSR	At3g22970	Bra001897	F
A03	BJ_VH_1141	91.5	SNP	At2g04350	Bra013210	G
A03	At3G24520	91.6	IP	At3g24520	Bra013253	F
A03	UGM0183	91.7	Genic SSR	At3g24800	Bra013241	F
A03	BrgMS2941	91.9	Genomic SSR	At2g06850	Bra013164	G
A03	At2g05990	92.1	IP	At2g05990	Bra013160	G
A03	At2g05755	92.2	IP	At2g05755	Bra013171	G
A03	At2g05620	92.2	IP	At2g05620	Bra013173	G
A03	At2g12462	92.4	IP	At2g12462	Bra013153	G
A03	BJ_VH_0723	92.5	SNP	At2g06050	Bra013161	G
A03	At2g14045	92.6	IP	At2g14045	Bra013132	G
A03	BJ_VH_0724	92.7	SNP	At2g05760	Bra013170	G
A03	BJ_VH_00041	93.3	SNP	At2g12462	Bra013153	G
A03	BJ_VH_00037	93.4	SNP	At4g14530	Bra013125	G
A03	BJ_VH_00038	93.4	SNP	At2g14260	Bra013127	G
A03	BJ_VH_00040	93.4	SNP	At2g12550	Bra013150	G
A03	At2g12400	93.5	IP	At2g12400	Bra013154	G
A03	e31m47t90	94.2	AFLP	-	-	-
A03	At2g16070	94.2	IP	At2g16070	Bra013085	H
A03	p32t77v330	94.4	AFLP	-	-	-
A03	e48t78v110	94.8	AFLP	-	-	-
A03	BJ_VH_00035	94.9	SNP	At2g15000	Bra013114	H
A03	BJ_VH_00033	95.2	SNP	At2g15025	Bra013113	H
A03	BJ_VH_0726	95.2	SNP	At2g15695	Bra013098	H
A03	BrgMS3024	95.6	Genomic SSR	At2g15890	Bra013091	H
A03	UGM1735	95.7	Genic SSR	-	-	-
A03	BJ_VH_00026	96.9	SNP	At5g60840	Bra013004	X
A03	BJ_VH_00029	97	SNP	At5g23070	Bra013014	Q
A03	At5g23020b	97.2	IP	At5g23020	Bra013007	Q
A03	BJ_VH_00028	97.3	SNP	At5g23060	Bra013013	Q
A03	BrgMS481	97.4	Genomic SSR	At5g61130	Bra012981	X
A03	At5g61420a	98	IP	At5g61420	Bra012961	X
A03	BJ_VH_0761	98.2	SNP	At5g61440	Bra012959	X
A03	BJ_VH_0760	98.7	SNP	At5g61460	Bra012956	X
A03	BRMS-042	98.9	Genomic SSR	-	-	-
A03	BRMS-042-2	99	Genomic SSR	-	-	-
A03	BJ_VH_0758	99.1	SNP	At5g61540	Bra012945	X
A03	BJ_VH_0759	99.2	SNP	At5g61480	Bra012952	X
A03	cnu_m325a	99.3	Genomic SSR	-	-	-
A03	BRMS-050	99.3	Genomic SSR	-	-	-
A03	BJ_VH_0239	99.5	SNP	At3g49990	Bra012912	M
A03	cnu_m555a	100	Genomic SSR	At3g50060	Bra012910	M
A03	BJ_VH_0735	100.2	SNP	At3g51160	Bra012865	N
A03	BJ_VH_00018	100.4	SNP	At3g50750	Bra012891	N
A03	BJ_VH_0734	100.5	SNP	At3g51050	Bra012871	N
A03	UGM1666	100.5	Genic SSR	-	-	-
A03	BJ_VH_00016	100.6	SNP	At3g51100	Bra012869	N
A03	At3g51100a	101.1	IP	At3g51100	Bra012869	N
A03	BJ_VH_00015	101.3	SNP	At3g52155	Bra012818	N
A03	BJ_VH_00013	101.3	SNP	-	Bra012812	N
A03	cnu_m438a	101.4	Genomic SSR	At3g52450	Bra012803	N
A03	cnu_m371a	101.4	Genomic SSR	-	-	-
A03	cnu_m409a	101.4	Genomic SSR	-	-	-
A03	UGM1691b	101.5	Genic SSR	At3g52280	Bra012810	N
A03	At3g52300	101.6	IP	At3g52300	Bra012809	N
A03	e31m61v99	101.6	AFLP	-	-	-
A03	At3g51260c	101.6	IP	At3g51260	Bra012861	N
A03	At3g51800	101.6	IP	At3g51800	Bra012836	N
A03	At3g52030a	101.6	IP	At3g52030	Bra012824	N
A03	BJ_VH_0234	102.4	SNP	At4g15820	Bra012762	T
A03	BJ_VH_0749	102.5	SNP	At4g15840	Bra012761	T
A03	BJ_VH_0228	102.6	SNP	At4g14790	-	T
A03	BJ_VH_0230	102.6	SNP	At4g14746	-	T
A03	cnu_m435a	102.6	Genomic SSR	At4g16590	Bra012702	U
A03	UGM1681a	102.6	Genic SSR	At4g24230	Bra019240	U
A03	UGM1439	102.9	Genic SSR	At4g17090	Bra012676	U
A03	UGM0058	103.2	Genic SSR	At4g17090	Bra012676	U
A03	At4g16400b	103.4	IP	At4g16400	Bra012723	U
A03	At4g17615a	103.7	IP	At4g17615	Bra012655	U
A03	At4g17900a	103.9	IP	At4g17900	Bra012632	U
A03	BJ_VH_0569	104.2	SNP	-	-	-
A03	BJ_VH_0231	104.2	SNP	At4g17370	Bra012668	U
A03	BJ_VH_0707	104.2	SNP	-	Bra012618	U
A03	cnu_m571a	104.3	Genomic SSR	At4g17800	Bra012639	U
A03	e31m50h87	104.5	AFLP	-	-	-
A03	BrgMS95b	104.7	Genomic SSR	At4g18340	Bra012604	U
A03	At4g17050a	105	IP	At4g17050	Bra012682	U
A03	At4g21400	105	IP	At4g21400	Bra038767	U
A03	BrgMS2628	105.1	Genomic SSR	At4g21760	Bra038756	U
A03	cnu_m527a	105.2	Genomic SSR	At4g18596	Bra012585	U
A03	At4g18400a	105.3	IP	At4g18400	Bra012599	U
A03	cnu_m413a	105.7	Genomic SSR	At4g19700	Bra012532	U
A03	e45m34d200	105.7	AFLP	-	-	-
A03	At4g23100a	105.8	IP	At4g23100	Bra019333	U
A03	At4g19490	105.8	IP	At4g19490	Bra012539	U
A03	At4g20150b	105.9	IP	At4g20150	Bra012516	U
A03	cnu_m455a	105.9	Genomic SSR	At4g19670	Bra012536	U
A03	cnu_m492a-2	106	Genomic SSR	At4g19680	Bra012535	U
A03	BrgMS1654	106.4	Genomic SSR	At4g21030	Bra038790	U
A03	Na14-g02	107	Genomic SSR	-	-	-
A03	e31m62t180	107.1	AFLP	-	-	-
A03	At4g23330	107.2	IP	At4g23330	-	U
A03	BJ_VH_0299	107.5	SNP	At4g23790	Bra019266	U
A03	e31m42v250	107.8	AFLP	-	-	-
A03	At4g24550b	108.3	IP	At4g24550	Bra019220	U
A03	UGM1791	108.7	Genic SSR	At4g22320	Bra019383	U
A03	At4g24440	108.8	IP	At4g24440	Bra019228	U
A03	BJ_EJ_0062	109.1	SNP	At4g25670	Bra019146	U
A03	cnu_m316a	110.3	Genomic SSR	At4g16170	Bra012734	U
A03	e44m38d365	110.8	AFLP	-	-	-
A03	UGM0139	111.3	Genic SSR	At4g25210	Bra019183	U
A03	cnu_m522a	112.7	Genomic SSR	-	Bra019236	U
A03	BJ_EJ_0060	113.4	SNP	At4g28740	Bra024182	U
A03	cnu_m514a	113.5	Genomic SSR	-	Bra019128	U
A03	BJ_VH_0335	113.5	SNP	At4g27800	Bra019026	U
A03	At4g28830a	114.1	IP	At4g28830	Bra024180	U
A03	At4g26240b	114.1	IP	At4g26240	Bra019116	U
A03	At4g30580	114.1	IP	At4g30580	Bra024062	U
A03	e35t63d170	114.1	AFLP	-	-	-
A03	At4g28025	114.4	IP	At4g28025	Bra024234	U
A03	e31m49d340	114.7	AFLP	-	-	-
A03	UGM0866	114.9	Genic SSR	At4g27310	Bra019058	U
A03	p61m57v318	115.8	AFLP	-	-	-
A03	UGM1831	116	Genic SSR	-	Bra024196	U
A03	UGM2027	116.3	Genic SSR	At4g31450	Bra024009	U
A03	BJ_EJ_0063	116.4	SNP	At4g30310	Bra024086	U
A03	BJ_VH_0333	116.6	SNP	At4g30720	Bra024046	U
A03	At4g31770	116.8	IP	At4g31770	Bra023984	U
A03	UGM0812	116.9	Genic SSR	At4g33350	-	U
A03	UGM0694	117	Genic SSR	At4g31480	Bra024005	U
A03	BrgMS3099	117.1	Genomic SSR	At4g31900	Bra023974	U
A03	BJ_EJ_0059	117.1	SNP	At4g36945	Bra017803	U
A03	BJ_VH_0179	117.3	SNP	At4g26130	-	U
A03	BJ_EJ_0056	117.3	SNP	At4g34180	Bra017633	U
A03	BJ_VH_0289	117.3	SNP	At4g34980	Bra017684	U
A03	UGM1009	117.4	Genic SSR	At4g35890	Bra017734	U
A03	BJ_VH_0288	117.5	SNP	At4g34610	Bra017666	U
A03	BJ_VH_0750	117.6	SNP	At4g36945	Bra017803	U
A03	BJ_VH_0446	117.7	SNP	-	-	-
A03	BJ_VH_0447	117.7	SNP	At4g32960	Bra037032	U
A03	BJ_VH_0332	117.7	SNP	At1g30540	-	B
A03	BJ_VH_0291	117.8	SNP	At4g36650	Bra017769	U
A03	UGM0310	117.9	Genic SSR	At4g33210	Bra037014	U
A03	BJ_EJ_0058	118.1	SNP	At4g36650	Bra017769	U
A03	e31m61t400	118.2	AFLP	-	-	-
A03	At4g30790b	118.3	IP	At4g30790	Bra024043	U
A03	UGM1875	118.4	Genic SSR	At4g31340	Bra024012	U
A03	At4G33905	118.4	IP	At4g33905	Bra036971	U
A03	At4g35000	118.7	IP	At4g35000	Bra017686	U
A03	At4g33625	118.7	IP	At4g33625	Bra036993	U
A03	cnu_m419a	118.7	Genomic SSR	At4g32770	Bra037042	U
A03	At4g34460c	118.8	IP	At4g34460	Bra017658	U
A03	At4g35905	118.9	IP	At4g35905	Bra017736	U
A03	At4g35530	119.4	IP	At4g35530	Bra017719	U
A03	cnu_m146a	119.4	Genomic SSR	At4g37740	Bra017851	U
A03	At4g36960b	119.5	IP	At4g36960	Bra017802	U
A03	cnu_m145a	119.6	Genomic SSR	At4g37610	Bra017839	U
A03	UGM0168	119.8	Genic SSR	At4g24590	Bra019216	U
A03	Ra3-D02B	120	Genomic SSR	-	-	-
A03	nia_m072a-2	120.9	Genomic SSR	At4g34700	Bra017671	U
A03	At4g26710	122	IP	At4g26710	Bra019088	U
A03	At4g25140c	124	IP	At4g25140	Bra019186	U
A03	e32t70v718	125	AFLP	-	-	-
A03	UGM0152	130.1	Genic SSR	-	-	-
A04	cnu_m566a	0	Genomic SSR	At3g63180	Bra040436	N
A04	At3g63420b	4	IP	At3g63420	-	N
A04	At3g54130b	4.2	IP	At3g54130	Bra014839	N
A04	BJ_VH_0766	4.5	SNP	At3g63250	Bra040439	N
A04	BJ_VH_0783	4.5	SNP	At3g61200	Bra014449	N
A04	cnu_m124a	4.6	Genomic SSR	At3g63210	Bra040437	N
A04	BJ_VH_0782	4.7	SNP	At3g61680	Bra014425	N
A04	cnu_m026a-1	5.8	Genomic SSR	-	-	-
A04	BrgMS247	6.3	Genomic SSR	At3g55646	Bra014730	N
A04	e35t63d200	6.8	AFLP	-	-	-
A04	Ni2-F11	7.2	Genomic SSR	-	-	-
A04	UGM1078	7.6	Genic SSR	At3g54010	Bra014849	N
A04	BrgMS677a	7.7	Genomic SSR	-	-	-
A04	p62t78d120	8.5	AFLP	-	-	-
A04	UGM1257	8.7	Genic SSR	At3g56050	Bra014711	N
A04	At3g55440b	9	IP	At3g55440	Bra014743	N
A04	At3g54650a	9.2	IP	At3g54650	Bra014802	N
A04	At3g58500a	9.3	IP	At3g58500	Bra014569	N
A04	nia_m060a	9.5	Genomic SSR	-	-	-
A04	BJ_VH_0784	9.5	SNP	At3g55605	Bra014733	N
A04	BJ_VH_0763	9.5	SNP	-	Bra014585	N
A04	At3G60310	10	IP	At3g60310	Bra014498	N
A04	p62m59h197	10.2	AFLP	-	-	-
A04	cnu_m225a	10.4	Genomic SSR	At3g53540	Bra039800	N
A04	UGM0072	10.5	Genic SSR	-	-	-
A04	BJ_VH_0785	10.5	SNP	At3g54030	Bra014847	N
A04	BJ_VH_0786	10.5	SNP	At3g53100	Bra040686	N
A04	UGM1024	11	Genic SSR	At3g58660	Bra014561	N
A04	At4g13940b	11.1	IP	At4g13940	Bra032750	T
A04	BJ_VH_0394	11.2	SNP	At4g13730	Bra032733	T
A04	At5g37480	11.2	IP	At5g37480	Bra028123	S
A04	At5g36950	11.2	IP	At5g36950	Bra028101	S
A04	At5g37590	11.3	IP	At5g37590	Bra028130	S
A04	At5g40670a	11.3	IP	At5g40670	Bra025554	S
A04	BJ_VH_1129	11.6	SNP	At5g35970	-	S
A04	BrgMS358	11.8	Genomic SSR	-	-	-
A04	UGM0730	12	Genic SSR	-	-	-
A04	At5g37630	12	IP	At5g37630	Bra028134	S
A04	UGM2043	12.3	Genic SSR	At3g56050	Bra014711	N
A04	BJ_VH_0795	12.6	SNP	At5g38840	Bra028208	S
A04	At5g37850	13.2	IP	At5g37850	Bra028155	S
A04	BJ_VH_0794	13.5	SNP	At5g39600	Bra025659	S
A04	At5g40200	13.6	IP	At5g40200	Bra025600	S
A04	BJ_VH_0791	13.6	SNP	At5g40440	Bra025576	S
A04	BJ_VH_0792	13.6	SNP	At5g40160	Bra025602	S
A04	BJ_VH_0796	13.6	SNP	At5g39380	Bra028239	S
A04	At5g40390	14	IP	At5g40390	Bra025579	S
A04	BJ_VH_0790	14.5	SNP	At5g40660	Bra025555	S
A04	At5g40950	14.7	IP	At5g40950	Bra025534	S
A04	UGM1026	15.3	Genic SSR	At5g40230	Bra025599	S
A04	BJ_VH_0789	15.4	SNP	At5g41330	Bra025506	S
A04	BJ_VH_0788	15.4	SNP	At5g41410	Bra025497	S
A04	BJ_VH_0501	15.4	SNP	-	-	-
A04	At5g41360	15.5	IP	At5g41360	Bra025503	S
A04	At5g41560	15.7	IP	At5g41560	Bra025491	S
A04	UGM0160	15.9	Genic SSR	At5g40930	Bra030327	S
A04	BJ_VH_0382	16.2	SNP	-	-	-
A04	BJ_VH_0767	16.2	SNP	At2g21950	Bra030269	I
A04	BJ_VH_1120	16.2	SNP	At2g21140	Bra030319	I
A04	e50t67d138	16.3	AFLP	-	-	-
A04	At5g41940	16.6	IP	At5g41940	Bra025455	S
A04	At2g21150	16.6	IP	At2g21150	Bra030318	I
A04	At2g22000a	17.3	IP	At2g22000	-	I
A04	At2g22640	17.4	IP	At2g22640	Bra030221	I
A04	At5g39220a	17.6	IP	At5g39220	Bra030354	S
A04	nia_m021a	19.4	Genomic SSR	-	-	-
A04	At2g24765a	21	IP	At2g24765	Bra032062	I
A04	At2g25737	21.2	IP	At2g25737	Bra034269	I
A04	p53m47h285	22.3	AFLP	-	-	-
A04	UGM0134a	22.8	Genic SSR	At2g24200	Bra032118	I
A04	BJ_VH_0419	24.7	SNP	At2g27960	Bra034380	I
A04	At2g28880b	27.8	IP	At2g28880	Bra035662	I
A04	cnu_m590a-2	29	Genomic SSR	At2g29080	Bra035651	I
A04	At2g30130	30.2	IP	At2g30130	Bra021612	J
A04	e47m43h330	30.7	AFLP	-	-	-
A04	UGM0149	32.8	Genic SSR	At2g31380	Bra021734	J
A04	At2G31500	33.5	IP	At2g31500	Bra021727	J
A04	cnu_m294a	35.6	Genomic SSR	At2g32530	Bra021796	J
A04	At2g33860	35.7	IP	At2g33860	Bra021885	J
A04	At2g34050a	35.7	IP	At2g34050	Bra021891	J
A04	At2g32520	36.6	IP	At2g32520	Bra021795	J
A04	At2g35120b	36.7	IP	At2g35120	Bra017332	J
A04	At2g33040a	37.3	IP	At2g33040	Bra021826	J
A04	At2g33620	38.1	IP	At2g33620	Bra021865	J
A04	BJ_VH_0775	40.4	SNP	At2g33580	Bra021861	J
A04	BJ_VH_0776	40.8	SNP	At2g33800	Bra021879	J
A04	e31m58v101	41.2	AFLP	-	-	-
A04	BJ_VH_0778	42.6	SNP	At2g35010	Bra021942	J
A04	At2g35770	42.6	IP	At2g35770	Bra017293	J
A04	At2g35790	44.5	IP	At2g35790	Bra017292	J
A04	UGM0270	44.6	Genic SSR	-	-	-
A04	At2g35990	45.4	IP	At2g35990	Bra017270	J
A04	At2g36530c	46.1	IP	At2g36530	Bra017231	J
A04	cnu_m102a	47.4	Genomic SSR	At2g36420	Bra017237	J
A04	BJ_VH_1121	47.6	SNP	At2g36990	Bra017213	J
A04	e31m47v111	50.4	AFLP	-	-	-
A04	At2g37540	50.5	IP	At2g37540	Bra017180	J
A04	BJ_VH_0774	53.9	SNP	At2g39000	Bra017092	J
A04	BJ_VH_0285	54.2	SNP	At2g39725	Bra017056	J
A04	BJ_VH_0771	54.3	SNP	At2g39740	Bra017054	J
A04	At2g40765d	56.8	IP	At2g40765	-	J
A04	At2g40890	56.8	IP	At2g40890	Bra016964	J
A04	UGM0328	57.1	Genic SSR	At2g40380	Bra017036	J
A04	UGM1357	58.1	Genic SSR	At2g41430	Bra016934	J
A04	BJ_VH_0768	58.4	SNP	At2g41120	Bra016952	J
A04	Na12-E05	58.7	Genomic SSR	-	-	-
A04	BJ_VH_0282	58.9	SNP	At2g41600	Bra016925	J
A04	BrgMS82	59.1	Genomic SSR	-	-	-
A04	UGM1505	59.4	Genic SSR	At2g42610	Bra016865	J
A04	At2G36050	59.8	IP	At2g36050	Bra017265	J
A04	At2g42040	59.9	IP	At2g42040	Bra016897	J
A04	e46m59v166	63.7	AFLP	-	-	-
A04	BJ_VH_1151	64.7	SNP	At2g43290	Bra037722	J
A04	BJ_VH_0451	64.7	SNP	-	-	-
A04	At2g43080	64.9	IP	At2g43080	Bra037736	J
A04	BrgMS867	65.6	Genomic SSR	-	Bra040334	J
A04	BJ_VH_0780	65.9	SNP	At2g46580	Bra039273	J
A04	BJ_VH_0781	65.9	SNP	At2g45590	Bra039326	J
A04	cnu_m604a	66.2	Genomic SSR	At2g45910	Bra039305	J
A04	wg1h4a	66.4	RFLP	-	-	-
A04	p63t78v400	66.5	AFLP	-	-	-
A04	At2g44610a	66.5	IP	At2g44610	Bra037641	J
A04	At2g45200b	66.6	IP	At2g45200	Bra040321	J
A04	cnu_m005a	67.1	Genomic SSR	At2g45830	Bra039310	J
A04	cnu_m605a	69.2	Genomic SSR	At2g45770	Bra039315	J
A04	At2g44050a	73.7	IP	At2g44050	Bra037670	J
A05	cnu_m471a	0	Genomic SSR	At2g47440	Bra004457	J
A05	BrgMS32	3.8	Genomic SSR	At2g47890	Bra004423	J
A05	cnu_m472a	4.8	Genomic SSR	At2g47980	Bra004420	J
A05	BrgMS132a	5.7	Genomic SSR	-	-	-
A05	cnu_m387a	6	Genomic SSR	At2g47440	Bra004457	J
A05	BJ_VH_0827	6.7	SNP	At2g47700	Bra004436	J
A05	BJ_VH_0828	6.8	SNP	At2g47680	Bra004438	J
A05	UGM0099	6.8	Genic SSR	At2g47580	Bra004445	J
A05	BJ_VH_0798	7.1	SNP	At2g48070	Bra004417	J
A05	BJ_VH_1133	7.3	SNP	-	Bra004449	J
A05	BrgMS643	7.5	Genomic SSR	At2g47270	Bra004465	J
A05	At2g46390	7.5	IP	At2g46390	-	J
A05	BJ_VH_0829	7.5	SNP	At2g46950	Bra004491	J
A05	wg6d7a	7.5	RFLP	-	-	-
A05	BJ_VH_0131	7.7	SNP	-	-	-
A05	BJ_VH_0832	8.9	SNP	At2g42800	Bra004719	J
A05	BrgMS781	9.9	Genomic SSR	At2g42460	Bra004695	J
A05	UGM0734	14	Genic SSR	At2g43970	Bra004795	J
A05	BRMS-034	14.1	Genomic SSR	At2g43710	Bra004778	J
A05	At2g42880b	14.7	IP	At2g42880	Bra004727	J
A05	UGM0203b	15.2	Genic SSR	At2g43770	Bra004783	J
A05	At2g43945b	15.2	IP	At2g43945	Bra004794	J
A05	BJ_VH_0833	16.7	SNP	At2g44140	Bra004808	J
A05	At2g44745	17.9	IP	At2g44745	Bra004864	J
A05	BJ_VH_0836	18.4	SNP	At2g45240	Bra004893	J
A05	At2g44970	18.8	IP	At2g44970	Bra004880	J
A05	p48t94h420	19.1	AFLP	-	-	-
A05	cnu_m286a	19.8	Genomic SSR	-	-	-
A05	nia_m017a	19.9	Genomic SSR	At2g45540	Bra004920	J
A05	At2g45790c	20.4	IP	At2g45790	Bra004938	J
A05	At2g43790b	22.5	IP	At2g43790	Bra004784	J
A05	UGM0205b	25.7	Genic SSR	At2g39550	Bra005031	J
A05	UGM1584	26.5	Genic SSR	-	-	-
A05	At2g36360	27.1	IP	At2g36360	Bra005279	J
A05	BJ_VH_1123	27.6	SNP	At2g36670	Bra005254	J
A05	BJ_VH_0838	27.8	SNP	At2g36490	Bra005264	J
A05	BJ_VH_1122	28.6	SNP	At2g38130	Bra005135	J
A05	Bra005141-AA	28.7	SNP	At2g38040	Bra005141	J
A05	UGM0005b	29.6	Genic SSR	At2g33150	Bra005522	J
A05	BJ_VH_1125	30.3	SNP	At2g34900	Bra005383	J
A05	cnu_m293a	30.3	Genomic SSR	At2g37450	Bra005193	J
A05	BJ_VH_0840	30.4	SNP	At2g34640	Bra005404	J
A05	e43m59h99	30.4	AFLP	-	-	-
A05	cnu_m088a	30.6	Genomic SSR	At2g34700	Bra005399	J
A05	BJ_VH_1126	30.7	SNP	At2g34720	Bra005397	J
A05	p32t77d380	32.3	AFLP	-	-	-
A05	e55t73t240	33	AFLP	-	-	-
A05	At2g32920	33.4	IP	At2g32920	Bra005546	J
A05	e47t70v258	33.6	AFLP	-	-	-
A05	At2g30410	34.3	IP	At2g30410	Bra018315	J
A05	BJ_VH_0842	34.7	SNP	At2g32230	Bra005573	J
A05	BJ_VH_0800	34.7	SNP	-	Bra018257	J
A05	At2g30200	35.5	IP	At2g30200	Bra018329	J
A05	At2g29980a	37.8	IP	At2g29980	Bra018348	J
A05	At2g29630	38.3	IP	At2g29630	Bra018372	J
A05	UGM1632	38.8	Genic SSR	-	-	-
A05	BJ_VH_1144	39.3	SNP	At2g29590	Bra018375	J
A05	BJ_VH_0448	39.4	SNP	-	Bra037055	S
A05	At2g29400	39.5	IP	At2g29400	Bra018397	J
A05	BJ_VH_0851	39.6	SNP	At5g36170	Bra039494	S
A05	e34m62v157	39.7	AFLP	-	-	-
A05	UGM0219	39.7	Genic SSR	-	-	-
A05	At5g36230	39.7	IP	At5g36230	Bra039496	S
A05	BJ_VH_0848	40	SNP	At5g35840	Bra039485	S
A05	UGM1907	41.2	Genic SSR	At1g50620	Bra030481	C
A05	BJ_VH_0807	41.3	SNP	At1g50620	Bra030481	C
A05	BJ_VH_0809	41.4	SNP	At1g47330	Bra032215	C
A05	e31m49v295	41.5	AFLP	-	-	-
A05	e31m42v144	41.7	AFLP	-	-	-
A05	cnu_m458a	41.9	Genomic SSR	-	-	-
A05	At1g31812a	41.9	IP	At1g31812	Bra033875	B
A05	At1g51740b	42	IP	At1g51740	-	C
A05	cnu_m029a	42	Genomic SSR	At1g48260	Bra032246	C
A05	At1g35460c	42	IP	At1g35460	Bra034421	B
A05	BJ_VH_0803	42	SNP	-	Bra034459	B
A05	e31m61v136	42	AFLP	-	-	-
A05	At1g35460	42	IP	At1g35460	Bra034421	B
A05	At3g21865	42	IP	At3g21865	Bra031314	F
A05	UGM1667	42.1	Genic SSR	At1g32070	Bra033861	B
A05	At1g36380	42.1	IP	At1g36380	-	B
A05	UGM1006	42.1	Genic SSR	-	-	-
A05	UGM1676	42.1	Genic SSR	-	-	-
A05	UGM0798	42.1	Genic SSR	-	-	-
A05	UGM2274	42.1	Genic SSR	At3g21650	Bra031294	F
A05	BJ_VH_0826	42.1	SNP	At3g22590	Bra040834	F
A05	e34m62v89	42.1	AFLP	-	-	-
A05	Na10-B08	42.1	Genomic SSR	-	-	-
A05	e48t78v225	42.1	AFLP	-	-	-
A05	e31m49v336	42.1	AFLP	-	-	-
A05	e31m58v430	42.1	AFLP	-	-	-
A05	cnu_m364a	42.1	Genomic SSR	-	-	-
A05	UGM0051	42.1	Genic SSR	At3g22480	Bra039955	F
A05	BJ_VH_0125	42.2	SNP	-	-	-
A05	At1g34640	42.2	IP	At1g34640	Bra034433	B
A05	e50t66t380	43	AFLP	-	-	-
A05	e35t63v351	43.4	AFLP	-	-	-
A05	At1g32440-010164a	44.1	IP	At1g32440	Bra010164	B
A05	cnu_m105a	45.5	Genomic SSR	At3g21260	Bra031268	F
A05	UGM0233	46.3	Genic SSR	At3g18990	Bra022376	F
A05	UGM1956	46.5	Genic SSR	At3g19130	Bra022389	F
A05	e48m32h244	47.2	AFLP	-	-	-
A05	BJ_VH_0810	48.8	SNP	At3g16270	Bra027178	F
A05	UGM0240	49.2	Genic SSR	At3g17020	Bra022190	F
A05	At3g16310	49.9	IP	At3g16310	Bra027174	F
A05	BJ_VH_0812	50.7	SNP	At3g15520	Bra027235	F
A05	e31m50t98	51.5	AFLP	-	-	-
A05	UGM0720	52.3	Genic SSR	At3g15095	Bra027279	F
A05	UGM2003	53	Genic SSR	At3g14350	Bra027347	F
A05	UGM1518	53.9	Genic SSR	-	-	-
A05	At3g12260c	55.5	IP	At3g12260	Bra034766	F
A05	UGM0708b	55.8	Genic SSR	At3g12740	Bra034736	F
A05	BrgMS226	55.9	Genomic SSR	At3g12490	Bra034755	F
A05	Ra3-H10	56.1	Genomic SSR	-	-	-
A05	BrgMS306	56.4	Genomic SSR	-	Bra027361	F
A05	BrgMS1774	56.9	Genomic SSR	At3g12150	Bra034773	F
A05	BJ_VH_1150	56.9	SNP	-	-	-
A05	At3g12120a	57.3	IP	At3g12120	Bra034777	F
A05	BrgMS1773	57.5	Genomic SSR	-	-	-
A05	e62m35h190	57.8	AFLP	-	-	-
A05	BrgMS641	61.8	Genomic SSR	-	Bra022192	F
A05	cnu_m442a	61.8	Genomic SSR	At3g13990	Bra027380	F
A05	At3g11500	63.3	IP	At3g11500	Bra034834	F
A05	BJ_VH_0821	64.6	SNP	At3g10970	Bra029883	F
A05	UGM0213b	65	Genic SSR	At3g10970	Bra029883	F
A05	cnu_m268a	66.6	Genomic SSR	At3g12670	Bra034745	F
A05	BrgMS457a	67.7	Genomic SSR	At3g09770	Bra029786	F
A05	UGM0448	68	Genic SSR	At3g09740	Bra029785	F
A05	At3g08690b	68.6	IP	At3g08690	Bra029711	F
A05	BJ_VH_0820	68.8	SNP	At3g09960	Bra029809	F
A05	BJ_VH_0819	68.8	SNP	At3g09650	Bra029781	F
A05	At3g09925	68.8	IP	At3g09925	Bra029806	F
A05	BrgMS141	69.1	Genomic SSR	At3g10470	Bra029843	F
A05	p32t77v301	70.9	AFLP	-	-	-
A05	UGM1780a	72.6	Genic SSR	At3g09370	Bra029762	F
A05	p32t77h310	73.7	AFLP	-	-	-
A05	BrgMS692	74.8	Genomic SSR	At3g07650	Bra029666	F
A05	BJ_VH_0544	74.9	SNP	At3g08680	Bra029710	F
A05	BJ_VH_0815	75.2	SNP	At3g06810	Bra029606	F
A05	cnu_m362a	75.9	Genomic SSR	-	-	-
A05	UGM2135	77.5	Genic SSR	At3g06868	Bra029609	F
A05	UGM0192	81.4	Genic SSR	At3g06410	Bra020749	F
A05	UGM0831	82.5	Genic SSR	At3g06130	Bra020773	F
A05	At3G05280	83.8	IP	At3g05280	Bra039447	F
A05	At3g01040	84.4	IP	At3g01040	Bra039149	F
A05	BJ_VH_0825	84.5	SNP	At3g02680	Bra040593	F
A05	BJ_VH_0672	84.5	SNP	At3g03210	Bra032007	F
A05	BJ_VH_0823	84.6	SNP	At3g02110	Bra039155	F
A05	e50t66v470	86.4	AFLP	-	-	-
A05	e34m62d250	86.8	AFLP	-	-	-
A05	At3g03250	88.1	IP	At3g03250	Bra032004	F
A05	e35t63v240	92	AFLP	-	-	-
A05	UGM0472a	97	Genic SSR	At3g01490	Bra039114	F
A06	BrgMS353	0	Genomic SSR	At1g52825	Bra018990	C
A06	UGM2130	1.67108	Genic SSR	At1g53190	Bra039659	C
A06	UGM0970	2.94763	Genic SSR	At1g53210	Bra039661	C
A06	BJ_VH_0879	3	SNP	At1g55880	Bra038025	C
A06	BJ_VH_0877	3.4	SNP	At1g55320	Bra037992	C
A06	BJ_VH_0880	3.4	SNP	At1g53770	Bra039691	C
A06	At1g51740a	4.9	IP	At1g51740	-	C
A06	BJ_VH_0876	5.1	SNP	At1g52780	Bra018988	C
A06	e39m55h215	6.4	AFLP	-	-	-
A06	BJ_VH_0296	8.8	SNP	At1g51400	Bra018907	C
A06	UGM0672	9.37667	Genic SSR	-	-	-
A06	BJ_VH_0875	10.4	SNP	At1g51080	Bra018891	C
A06	At1g50575a	12	IP	At1g50575	Bra018858	C
A06	BJ_VH_0874	12.4	SNP	At1g50320	Bra018842	C
A06	BrgMS221	12.8	Genomic SSR	-	Bra018843	C
A06	At1g50030	13.8965	IP	At1g50030	Bra018828	C
A06	At1g48580	17.0172	IP	At1g48580	Bra018738	C
A06	e58t75h177	17.5	AFLP	-	-	-
A06	BJ_VH_0873	18.4	SNP	At1g49040	Bra018775	C
A06	BJ_VH_0871	18.4	SNP	At1g48580	Bra018738	C
A06	BJ_VH_0870	19.9	SNP	At1g48120	Bra018709	C
A06	BJ_VH_0859	20.3	SNP	At1g08550	Bra018616	A
A06	e31m50d105	21.4234	AFLP	-	-	-
A06	BJ_VH_0865	25.2	SNP	At1g09850	Bra019982	A
A06	nia_m133a	26.2	Genomic SSR	At1g10657	Bra019909	A
A06	BrgMS471c	26.8509	Genomic SSR	-	-	-
A06	cnu_m012a-2	27.8749	Genomic SSR	At1g48090	Bra018705	C
A06	At1g07980a	27.8749	IP	At1g07980	Bra018668	A
A06	UGM0697	29.5	Genic SSR	At1g11475	Bra019851	A
A06	At1g08580	30.0255	IP	At1g08580	Bra018613	A
A06	UGM0520c	30.2551	Genic SSR	At1g12760	Bra019784	A
A06	UGM0714a	30.3354	Genic SSR	-	-	-
A06	BJ_VH_0862	30.4	SNP	At1g13250	Bra019820	A
A06	cnu_m317a	31.6898	Genomic SSR	-	-	-
A06	UGM1149	31.7853	Genic SSR	-	-	-
A06	UGM0520a	32.1051	Genic SSR	At1g12760	Bra019784	A
A06	At1g12930	32.1194	IP	At1g12930	Bra019800	A
A06	At1g12230	33.2	IP	At1g12230	Bra019748	A
A06	At1g12840a	33.4	IP	At1g12840	Bra019792	A
A06	e31m42d260	33.4276	AFLP	-	-	-
A06	At1g13990	33.5035	IP	At1g13990	Bra019693	A
A06	UGM0774	33.9399	Genic SSR	At1g12230	Bra019748	A
A06	BJ_VH_0861	34.2	SNP	At1g14380	Bra019653	A
A06	nia_m134a	34.9766	Genomic SSR	-	Bra026136	A
A06	At1g15780	36.6906	IP	At1g15780	Bra026107	A
A06	BrgMS440	37.3	Genomic SSR	At1g17400	Bra025976	A
A06	At1g16310a	37.3525	IP	At1g16310	Bra026067	A
A06	BJ_VH_0869	37.4	SNP	At1g16350	Bra026064	A
A06	At1g16300	37.4	IP	At1g16300	Bra026068	A
A06	BJ_VH_0868	37.6	SNP	At1g16720	Bra026029	A
A06	BJ_VH_0866	38.2	SNP	At1g17650	Bra025958	A
A06	At1g16520	38.9	IP	At1g16520	Bra026043	A
A06	At1g16890	38.9599	IP	At1g16890	Bra026018	A
A06	e31m50d330	38.9671	AFLP	-	-	-
A06	At1g16970	39.3	IP	At1g16970	Bra026012	A
A06	At1g17680	39.3	IP	At1g17680	Bra025955	A
A06	UGM0481b	39.3468	Genic SSR	At1g17665	Bra025957	A
A06	UGM0483a	41.225	Genic SSR	At1g17290	Bra025984	A
A06	At1g18730b	43.7476	IP	At1g18730	Bra025682	A
A06	BrgMS438	43.9	Genomic SSR	At1g19835	Bra025772	B
A06	cnu_m050a	44.0649	Genomic SSR	-	-	-
A06	nia_m049a	44.7739	Genomic SSR	At1g19450	Bra025740	A
A06	cnu_m051a	45.3412	Genomic SSR	At1g19940	Bra025783	B
A06	At1g20100	45.7	IP	At1g20100	Bra025792	B
A06	At1g19240a	45.8724	IP	At1g19240	Bra025722	A
A06	At1g19850	46	IP	At1g19850	Bra025775	B
A06	e31m61h115	46.1	AFLP	-	-	-
A06	e43m50t180	46.4407	AFLP	-	-	-
A06	At1g20410a	46.538	IP	At1g20410	Bra025817	B
A06	cnu_m111a	46.5511	Genomic SSR	At3g48760	Bra018035	M
A06	cnu_m590a-1	46.6362	Genomic SSR	-	-	-
A06	BrgMS9	46.8	Genomic SSR	-	-	-
A06	At3g49680	47.0617	IP	At3g49680	Bra017964	M
A06	At1g20830	47.4627	IP	At1g20830	Bra025847	B
A06	BJ_VH_0903	47.7	SNP	At5g61840	Bra019618	X
A06	BJ_VH_1172	47.7	SNP	At3g46740	Bra018196	M
A06	BJ_VH_0348	47.7	SNP	At1g25580	-	B
A06	BJ_VH_00005	47.8	SNP	At5g62070	Bra010055	X
A06	e47t74t280	48.436	AFLP	-	-	-
A06	At5g65660	49.425	IP	At5g65660	Bra024405	X
A06	At2g18910	50.0907	IP	At2g18910	Bra024455	H
A06	UGM1594	50.1885	Genic SSR	-	-	-
A06	At2g17420a	50.2367	IP	At2g17420	Bra024516	H
A06	p62t78t140	50.5287	AFLP	-	-	-
A06	e31m42t377	50.8693	AFLP	-	-	-
A06	At2g18040b	51.3	IP	At2g18040	Bra024480	H
A06	BJ_VH_0161	51.3	SNP	At5g23570	Bra009695	Q
A06	BJ_VH_0894	51.4	SNP	At5g23940	Bra009716	Q
A06	BrgMS2145	51.8208	Genomic SSR	-	-	-
A06	At5g24090	52.1	IP	At5g24090	Bra009731	Q
A06	At5g23610	52.3	IP	At5g23610	Bra009698	Q
A06	UGM1235	52.3	Genic SSR	-	-	-
A06	At5g26770	53	IP	At5g26770	Bra009918	Q
A06	At5g27740a	53.4	IP	At5g27740	Bra009945	Q
A06	BrgMS12	53.9	Genomic SSR	At5g27820	Bra009942	Q
A06	BJ_VH_0895	54.1	SNP	At5g27330	Bra009969	Q
A06	BJ_VH_0172	54.2	SNP	At5g27395	Bra009966	Q
A06	At5g27320	54.8	IP	At5g27320	Bra009970	Q
A06	BJ_VH_1159	55.3	SNP	At5g48950	Bra037446	W
A06	e39m32v203	55.6	AFLP	-	-	-
A06	At5g48440	55.7587	IP	At5g48440	Bra037486	W
A06	BJ_VH_0902	55.9	SNP	At5g48020	Bra037515	W
A06	cnu_m240a	57.8772	Genomic SSR	At3g28410	Bra025326	L
A06	cnu_m220a	58.701	Genomic SSR	At3g25900	Bra025171	L
A06	At5g47890b	59.3361	IP	At5g47890	Bra037522	W
A06	e34m49h160	61.7	AFLP	-	-	-
A06	UGM0826	62.5113	Genic SSR	-	Bra025277	L
A06	cnu_m219a	63.2867	Genomic SSR	At3g27925	Bra025312	L
A06	At3g27340a	63.5	IP	At3g27340	Bra025269	L
A06	At3g27380	63.5	IP	At3g27380	Bra025272	L
A06	At3g27100	63.6	IP	At3g27100	Bra025249	L
A06	e34m50h330	63.7	AFLP	-	-	-
A06	cnu_m318a	64.2333	Genomic SSR	At3g27785	Bra025299	L
A06	UGM1466	64.4485	Genic SSR	At3g27350	Bra025270	L
A06	At3g26370	65.3	IP	At3g26370	Bra025202	L
A06	cnu_m400a	65.7	Genomic SSR	-	Bra025230	L
A06	BJ_VH_0885	66.4	SNP	At3g26950	Bra025239	L
A06	BJ_VH_0884	68.8	SNP	At3g25900	Bra025171	L
A06	At3g25830	69.0796	IP	At3g25830	Bra025164	L
A06	cnu_m211a	70.3	Genomic SSR	-	-	-
A06	BJ_VH_0883	70.8	SNP	At2g03640	Bra025122	K
A06	BJ_VH_0881	72.1	SNP	At2g02970	Bra024796	K
A06	At2g03870	72.6	IP	At2g03870	Bra025138	K
A06	cnu_m492a-1	72.7579	Genomic SSR	-	-	-
A06	BJ_VH_0882	73.1	SNP	At2g01860	Bra024847	K
A06	Ra2-F04	73.3	Genomic SSR	-	-	-
A06	At2g02760	73.5	IP	At2g02760	Bra024808	K
A06	At2g01850	73.7	IP	At2g01850	Bra024848	K
A06	UGM0416	74.1	Genic SSR	At2g01860	Bra024847	K
A06	UGM1697	74.2103	Genic SSR	At2g01830	Bra024849	K
A06	BrgMS262	74.9	Genomic SSR	At2g01520	Bra024879	K
A06	nia_m041a	76.6	Genomic SSR	-	-	-
A06	p63t78t240	77.1826	AFLP	-	-	-
A06	At2g01350	77.5	IP	At2g01350	-	K
A06	UGM2227	78.9975	Genic SSR	At2g01080	Bra024907	K
A06	BJ_VH_0853	79	SNP	At2g01220	Bra024896	K
A06	BJ_VH_0896	79.6	SNP	At5g47790	Bra024916	V
A06	UGM1942	83.0958	Genic SSR	At5g47060	Bra024965	V
A06	UGM1731	83.3322	Genic SSR	At5g46920	Bra024979	V
A06	BrgMS360	84.3	Genomic SSR	At5g43960	Bra033707	V
A06	UGM1043	85.6966	Genic SSR	At5g46400	Bra025019	V
A06	At5g47040	86.3	IP	At5g47040	Bra024968	V
A06	NiES29	86.3385	Genic SSR	-	-	-
A06	BJ_VH_0897	86.8	SNP	At5g46580	Bra025013	V
A06	BrgMS787	86.8	Genomic SSR	At5g42540	Bra033638	V
A06	BrgMS140	86.8629	Genomic SSR	-	-	-
A06	At5g45610	86.9	IP	At5g45610	Bra025067	V
A06	e31m60v400	87	AFLP	-	-	-
A06	BrgMS575	87.2	Genomic SSR	At5g45720	Bra025061	V
A06	BJ_VH_0898	87.4	SNP	At5g45420	Bra025078	V
A06	BrgMS409	87.7	Genomic SSR	-	-	-
A06	BrgMS761	88.1	Genomic SSR	At5g43870	Bra033702	V
A06	At5G44460	88.5843	IP	At5g44460	Bra033745	V
A06	BJ_VH_0899	91.4	SNP	At5g43020	Bra033656	V
A06	BJ_VH_0900	91.5	SNP	At5g44180	Bra033725	V
A06	e39m32t175	92.39	AFLP	-	-	-
A06	BrgMS232	92.4	Genomic SSR	At5g43090	Bra033659	V
A06	At5g42850	93.6188	IP	At5g42850	Bra033645	V
A06	e47t70h124	94.5	AFLP	-	-	-
A06	UGM0033	94.9	Genic SSR	At4g39040	Bra033596	U
A06	UGM0215	95.5	Genic SSR	At4g38260	Bra033559	U
A06	BJ_VH_0408	95.6	SNP	-	-	-
A06	BJ_VH_0409	95.7	SNP	At4g38500	Bra033565	U
A06	UGM0801	101.542	Genic SSR	-	-	-
A07	cnu_m608a	0	Genomic SSR	-	-	-
A07	At2g19560	1.8363	IP	At2g19560	-	H
A07	UGM1607	2.0692	Genic SSR	At2g19670	Bra039010	H
A07	cnu_m012a-1	2.6	Genomic SSR	-	-	-
A07	p63t71d400	2.9411	AFLP	-	-	-
A07	cnu_m062a	3.32622	Genomic SSR	-	Bra038851	H
A07	BrgMS471a	3.8	Genomic SSR	-	-	-
A07	nia_m072a-3	3.98	Genomic SSR	At2g18328	Bra039617	H
A07	e39m50v360	4.41918	AFLP	-	-	-
A07	UGM0625	4.5	Genic SSR	-	Bra039609	H
A07	e39m50h194	5.55616	AFLP	-	-	-
A07	p48t94h280	5.6	AFLP	-	-	-
A07	At2g19450a	5.6	IP	At2g19450	Bra039003	H
A07	p48t67t420	6.12466	AFLP	-	-	-
A07	p32t93v156	6.4	AFLP	-	-	-
A07	At2g18410	6.4	IP	At2g18410	Bra039611	H
A07	e50t66h298	6.4	AFLP	-	-	-
A07	At2g18900	6.4	IP	At2g18900	Bra038829	H
A07	e44m38h93	6.57945	AFLP	-	-	-
A07	e39m32v173	6.57945	AFLP	-	-	-
A07	e48t78h320	6.57945	AFLP	-	-	-
A07	e31m58h93	6.57945	AFLP	-	-	-
A07	e31m50d155	6.80685	AFLP	-	-	-
A07	BJ_VH_0942	6.9	SNP	At2g18710	Bra038815	H
A07	BJ_VH_0944	7.2	SNP	At2g18860	Bra038827	H
A07	e35t63v187	7.26164	AFLP	-	-	-
A07	At2g06510	7.48277	IP	At2g06510	Bra015187	G
A07	At2g18040a	7.6	IP	At2g18040	Bra039913	H
A07	UGM0047	7.7	Genic SSR	At2g16570	Bra001980	H
A07	BJ_VH_1083	7.7	SNP	At2g17300	Bra002049	H
A07	BJ_VH_1082	7.9	SNP	At2g16860	Bra001999	H
A07	BJ_VH_1086	7.9	SNP	At2g15790	Bra015238	H
A07	BJ_VH_0946	8	SNP	At2g17972	Bra039904	H
A07	BJ_VH_1072	8.1	SNP	-	Bra015239	H
A07	BJ_VH_1132	8.1	SNP	-	Bra002001	H
A07	BJ_VH_1085	8.1	SNP	At2g15695	Bra015231	H
A07	At2g15430b	8.3	IP	At2g15430	Bra015218	H
A07	BJ_VH_1143	8.5	SNP	-	Bra015251	H
A07	BJ_VH_1134	8.8	SNP	At2g04360	Bra015149	G
A07	e48t78h452	9	AFLP	-	-	-
A07	BJ_VH_0904	9	SNP	At2g04039	Bra015132	G
A07	BJ_VH_0940	9.2	SNP	At2g05920	Bra015172	G
A07	At3g24315a	9.2	IP	At3g24315	Bra015032	F
A07	BJ_VH_0938	9.2	SNP	At3g25430	Bra015126	F
A07	BJ_VH_1153	9.2	SNP	-	Bra036391	F
A07	BJ_VH_0905	9.3	SNP	At2g04360	Bra015149	G
A07	BJ_VH_0381	9.6	SNP	-	-	-
A07	e47t70t250	9.76301	AFLP	-	-	-
A07	e50t66h139	10.8	AFLP	-	-	-
A07	e45m34h102	10.9	AFLP	-	-	-
A07	BJ_VH_0909	12.2	SNP	At1g25420	Bra012478	B
A07	BRMS-040	13.5	Genomic SSR	-	-	-
A07	UGM1662	13.8708	Genic SSR	At1g30470	Bra014882	B
A07	nia_m045a	14.0388	Genomic SSR	-	-	-
A07	At1g23440a	15.4	IP	At1g23440	Bra012374	B
A07	UGM1571b	15.7734	Genic SSR	At1g26110	Bra012470	B
A07	e50t67h242	16.3	AFLP	-	-	-
A07	At1g21090	17.2	IP	At1g21090	Bra012267	B
A07	BrgMS4505	17.3	Genomic SSR	-	Bra030085	B
A07	UGM1630	17.3915	Genic SSR	At5g67350	Bra012156	X
A07	UGM2278	17.5574	Genic SSR	At5g67280	Bra012148	X
A07	BJ_VH_0908	17.9	SNP	At1g20430	Bra012229	B
A07	UGM0124	18.0141	Genic SSR	At1g21600	Bra012290	B
A07	BrgMS4508	18.4	Genomic SSR	At1g28280	Bra030082	B
A07	e31m50t250	18.6222	AFLP	-	-	-
A07	UGM2272	18.9266	Genic SSR	At5g67190	Bra012140	X
A07	e39m32h153	18.9389	AFLP	-	-	-
A07	cnu_m529a	19.5366	Genomic SSR	-	-	-
A07	UGM0512	20.2957	Genic SSR	At5g66210	Bra012058	X
A07	At5g67200	20.6	IP	At5g67200	Bra012141	X
A07	BJ_VH_00010	20.6	SNP	At5g67140	Bra012136	X
A07	BJ_VH_1135	20.9	SNP	-	Bra012097	X
A07	BJ_VH_00009	20.9	SNP	At5g66820	Bra012108	X
A07	e39m50h450	21.1556	AFLP	-	-	-
A07	BJ_VH_0225	21.2	SNP	At5g67330	Bra012154	X
A07	BN6A3	21.4	Genomic SSR	-	-	-
A07	UGM2046	21.7064	Genic SSR	At2g28070	Bra011981	I
A07	BJ_VH_0948	21.9	SNP	At2g26690	Bra012052	I
A07	BJ_VH_0947	21.9	SNP	At2g27470	Bra012016	I
A07	At2g26670	22	IP	At2g26670	Bra012054	I
A07	BJ_VH_0223	22.2	SNP	At2g28060	Bra011982	I
A07	e34m50v137	22.312	AFLP	-	-	-
A07	At2g27730	23.2	IP	At2g27730	Bra012003	I
A07	At2g27490	23.2	IP	At2g27490	Bra012011	I
A07	UGM1361b	24.9763	Genic SSR	At5g40340	Bra028455	S
A07	p40m82h174	26	AFLP	-	-	-
A07	At2g28880a	26.1	IP	At2g28880	Bra011921	I
A07	BJ_VH_0222	26.2	SNP	At2g28230	Bra011967	I
A07	At2g28430a	26.9213	IP	At2g28430	Bra011949	I
A07	BJ_VH_0689	27.4	SNP	At5g37830	Bra028393	S
A07	BJ_VH_0688	27.5	SNP	At5g38600	Bra028416	S
A07	BJ_VH_0690	27.6	SNP	At5g40340	Bra028455	S
A07	At5g38660	29.0179	IP	At5g38660	Bra028418	S
A07	At5g39950	29.421	IP	At5g39950	Bra028445	S
A07	At5g40740	30.6431	IP	At5g40740	Bra028473	S
A07	e62t75d210	31.7059	AFLP	-	-	-
A07	BJ_VH_0692	31.8	SNP	At5g41810	Bra028508	S
A07	UGM0018	33.081	Genic SSR	At5g42050	Bra028523	S
A07	e32t66h88	33.3007	AFLP	-	-	-
A07	UGM2219	33.5194	Genic SSR	At3g62630	Bra003502	N
A07	UGM1784	33.9424	Genic SSR	At3g62660	Bra003504	N
A07	wg2a11	34	RFLP	-	-	-
A07	BJ_VH_0949	34.3	SNP	At3g53410	Bra003133	N
A07	At3g53190a	34.4	IP	At3g53190	Bra028548	N
A07	BrgMS159	37.1	Genomic SSR	-	-	-
A07	At3G61710	37.3258	IP	At3g61710	Bra003466	N
A07	At3g55005d	37.9	IP	At3g55005	Bra003203	N
A07	At3g56290a	38.2	IP	At3g56290	Bra003236	N
A07	cnu_m298a	39.7	Genomic SSR	-	-	-
A07	Ra2-A01a	41.5	Genomic SSR	-	-	-
A07	UGM1309	42.7393	Genic SSR	At1g67230	Bra004210	E
A07	BJ_VH_0912	44.2	SNP	At1g79970	Bra003541	E
A07	BJ_VH_0127	44.2	SNP	At3g62370	Bra003497	N
A07	At1g79950	44.5	IP	At1g79950	Bra003540	E
A07	cnu_m341a	44.8952	Genomic SSR	At1g73920	Bra015954	E
A07	e44m50h400	47.1	AFLP	-	-	-
A07	At1g79040	47.3	IP	At1g79040	Bra035087	E
A07	At1g70800	48.4676	IP	At1g70800	Bra016184	E
A07	UGM0371b	51.6056	Genic SSR	At1g80300	Bra003560	E
A07	cnu_m054a	51.9809	Genomic SSR	At1g66290	Bra004156	E
A07	UGM0523a	51.9809	Genic SSR	-	Bra015765	E
A07	At1g75330a	52.0718	IP	At1g75330	Bra003758	E
A07	At1g74730a	52.1626	IP	At1g74730	Bra015897	E
A07	At1g67550b	52.1626	IP	At1g67550	-	E
A07	e31m42h173	52.4111	AFLP	-	-	-
A07	cnu_m155a	52.4958	Genomic SSR	At1g74220	Bra015927	E
A07	cnu_m331a	52.7381	Genomic SSR	At1g65020	Bra004108	E
A07	UGM0455	52.8895	Genic SSR	At1g73540	Bra015986	E
A07	BJ_VH_0919	53.4	SNP	At1g68830	Bra004340	E
A07	cnu_m049a	53.5	Genomic SSR	At1g76750	Bra003708	E
A07	BJ_VH_0918	54.1	SNP	At1g67190	Bra004208	E
A07	p62t78v211	54.4	AFLP	-	-	-
A07	At1g67350c	54.7	IP	At1g67350	Bra004221	E
A07	At1g67250	54.7	IP	At1g67250	Bra004098	E
A07	At1g67350a	55.1	IP	At1g67350	-	E
A07	p62t78d212	55.4481	AFLP	-	-	-
A07	At1g68370a	56.3	IP	At1g68370	Bra004301	E
A07	At1g68510	56.9	IP	At1g68510	Bra004315	E
A07	At1g68310a	57.3	IP	At1g68310	Bra004296	E
A07	UGM0023a	58.1345	Genic SSR	At1g73540	Bra015986	E
A07	cnu_m048a	58.4721	Genomic SSR	At1g75240	Bra003759	E
A07	BrgMS71	60.1639	Genomic SSR	-	Bra003792	E
A07	cnu_m510a	61.023	Genomic SSR	At1g72430	Bra003881	E
A07	cnu_m453a	61.6312	Genomic SSR	At1g67330	Bra004093	E
A07	p53m42h153	62.1	AFLP	-	-	-
A07	BJ_VH_0929	63.6	SNP	At1g71860	Bra016108	E
A07	BJ_VH_0928	63.7	SNP	At1g71850	Bra016107	E
A07	cnu_m056a	65.1279	Genomic SSR	At1g67900	Bra004064	E
A07	At1g73240	65.6052	IP	At1g73240	Bra016009	E
A07	BJ_VH_0926	65.7	SNP	At1g72480	Bra016055	E
A07	BJ_VH_0924	65.7	SNP	At1g73890	Bra015955	E
A07	BJ_VH_0921	65.7	SNP	At1g75100	Bra015866	E
A07	At1g75690a	66.4644	IP	At1g75690	Bra015826	E
A07	cnu_m043a	67.4	Genomic SSR	At1g67900	Bra004064	E
A07	At1g74140a	67.8963	IP	At1g74140	Bra015932	E
A07	UGM0527	68.8	Genic SSR	At1g75240	Bra015857	E
A07	At1g73990	70.5693	IP	At1g73990	Bra015946	E
A07	ec5a6	73.9	RFLP	-	-	-
A07	At1g76540a	76.2637	IP	At1g76540	Bra015735	E
A07	BrgMS419	80.5787	Genomic SSR	-	Bra015672	E
A08	At1g30880-039873a	0	IP	At1g30880	Bra039873	B
A08	e44m38d205	0.233526	AFLP	-	-	-
A08	cnu_m489a	0.452909	Genomic SSR	At4g14650	Bra039722	T
A08	At1g30880	0.452909	IP	At1g30880	Bra039873	B
A08	UGM0098a	0.452909	Genic SSR	-	Bra014011	-
A08	At1G31600	0.582715	IP	At1g31600	Bra038427	B
A08	e46m59t245	0.768208	AFLP	-	-	-
A08	UGM1003	1.06041	Genic SSR	-	Bra014215	C
A08	p48t94d340	1.51676	AFLP	-	-	-
A08	At1G49180	1.52833	IP	At1g49180	Bra014171	C
A08	e45m34d150	1.6237	AFLP	-	-	-
A08	e43m50d125	1.73064	AFLP	-	-	-
A08	UGM1362	2.20421	Genic SSR	At1g51600	Bra014292	C
A08	At4g15510	2.4	IP	At4g15510	Bra038081	T
A08	At4g17900b	2.4	IP	At4g17900	Bra021029	U
A08	At4g15910	2.4	IP	At4g15910	Bra038061	T
A08	Bra014352	2.5	IP	-	Bra014352	C
A08	p63t71v287	2.5	AFLP	-	-	-
A08	UGM1082a	2.56815	Genic SSR	-	Bra038959	T
A08	Bra035478	2.7	IP	-	Bra035478	B
A08	BJ_VH_0452	2.7	SNP	-	-	-
A08	At4g15802a	2.8	IP	At4g15802	Bra038064	T
A08	At4g14570b	2.8	IP	At4g14570	Bra039731	T
A08	BrgMS653	2.8	Genomic SSR	At4g19210	Bra020966-i	U
A08	At4g32551	2.8875	IP	At4g32551	Bra040085	U
A08	e34m49t270	2.93125	AFLP	-	-	-
A08	At4g31720a	2.93125	IP	At4g31720	Bra010224	U
A08	At4G35100	2.975	IP	At4g35100	Bra034675	U
A08	UGM1658	2.98407	Genic SSR	At1g49890	Bra014224	C
A08	e31m42t180	3.0625	AFLP	-	-	-
A08	BrgMS3076	3.1243	Genomic SSR	At1g42970	Bra034927	C
A08	UGM2039b	3.14005	Genic SSR	At1g49890	Bra014224	C
A08	At4g15210	3.19375	IP	At4g15210	Bra038088	T
A08	e31m50t275	3.19375	AFLP	-	-	-
A08	e62t75d218	3.2375	AFLP	-	-	-
A08	e39m32d148	3.325	AFLP	-	-	-
A08	UGM0617	3.4	Genic SSR	At1g49890	Bra014224	C
A08	UGM1386	3.4	Genic SSR	At1g49380	Bra014184	C
A08	At1g45230	3.4125	IP	At1g45230	Bra014046	C
A08	e31m60h92	3.5	AFLP	-	-	-
A08	BJ_VH_0457	3.6	SNP	-	-	-
A08	At1g31812b	3.6	IP	At1g31812	Bra038439	B
A08	At1g31910	3.6	IP	At1g31910	Bra035519	B
A08	BJ_VH_0268	3.6	SNP	-	-	-
A08	BJ_VH_0980	3.6	SNP	At5g35790	Bra035525	S
A08	At5g34940-038945a	3.6	IP	At5g34940	Bra038945	S
A08	BJ_VH_0462	3.6	SNP	-	-	-
A08	BJ_VH_0981	3.6	SNP	-	-	S
A08	BJ_VH_0463	3.6	SNP	-	-	-
A08	BJ_VH_1162	3.6	SNP	-	-	-
A08	BJ_VH_0982	3.6	SNP	-	-	S
A08	BJ_VH_0456	3.6	SNP	-	-	-
A08	BJ_VH_0968	3.7	SNP	At1g48950	Bra014163	C
A08	BJ_VH_0969	3.7	SNP	At1g48970	Bra014165	C
A08	At1g35680	3.7	IP	At1g35680	Bra036763	B
A08	BJ_VH_0967	3.7	SNP	At1g48300	Bra014125	C
A08	At4g33380	3.7	IP	At4g33380	Bra034559	U
A08	Bra014201-AA	3.75234	SNP	At1g49580	Bra014201	C
A08	UGM1869	3.77872	Genic SSR	-	Bra035504	B
A08	cnu_m090a	3.8	Genomic SSR	At1g30860	Bra039871	B
A08	e44m38t210	3.83333	AFLP	-	-	-
A08	UGM1080	4.06277	Genic SSR	At1g32700	Bra035494	B
A08	At1g50240	4.1	IP	At1g50240	-	C
A08	BJ_VH_0954	4.1	SNP	-	Bra030869	C
A08	BJ_VH_0976	4.1	SNP	At1g54090	Bra030907	C
A08	BJ_VH_0955	4.1	SNP	-	Bra030964	C
A08	BJ_VH_0970	4.2	SNP	At1g49870	Bra014222	C
A08	BJ_VH_0972	4.2	SNP	At1g52290	Bra014322	C
A08	p79t78v254	4.2	AFLP	-	-	-
A08	Ra1-A04	4.5	Genomic SSR	-	-	-
A08	At4g29960	4.78333	IP	At4g29960	Bra010309	U
A08	p65t90v258	5	AFLP	-	-	-
A08	UGM1273b	5.00957	Genic SSR	-	Bra038050	T
A08	Bra038945-AA	5.47944	SNP	At5g34940	Bra038945	S
A08	At4g32680	5.80833	IP	At4g32680	Bra040090	U
A08	Ra1-A04a	5.9	Genomic SSR	-	-	-
A08	p63t71d270	6.60556	AFLP	-	-	-
A08	UGM0456	7.99159	Genic SSR	-	-	-
A08	UGM0947	8.03936	Genic SSR	At4g19160	Bra020971	U
A08	Bra020884-AA	8.09626	SNP	At4g21100	Bra020884	U
A08	At4g21100-020884a	8.1	IP	At4g21100	Bra020884	U
A08	UGM1629b	8.3234	Genic SSR	At4g21450	Bra020894	U
A08	BJ_VH_0308	8.5	SNP	At4g22390	Bra020847	U
A08	p58t83t373	8.99722	AFLP	-	-	-
A08	At4g34460b	9.3	IP	At4g34460	Bra034628	U
A08	BJ_VH_0985	9.3	SNP	At4g34520	Bra034635	U
A08	e32t66v191	9.4	AFLP	-	-	-
A08	nia_m076a	9.56667	Genomic SSR	At4g39800	-	U
A08	BrgMS609	10.1	Genomic SSR	At4g34380	Bra034622	U
A08	UGM2062a	10.5011	Genic SSR	At4g30260	Bra010293	U
A08	At4g14145b	10.5917	IP	At4g14145	Bra010747	T
A08	e32t66h142	10.7	AFLP	-	-	-
A08	BJ_VH_00071	11.6	SNP	-	Bra034604	-
A08	MB5	11.8013	Genomic SSR	-	-	-
A08	BJ_VH_00070	12.1	SNP	At4g33910	Bra034591	U
A08	At4g32600-040087a	12.1	IP	At4g32600	Bra040087	U
A08	At4g33250b	12.1	IP	At4g33250	Bra034554	U
A08	At4g31460	12.3	IP	At4g31460	Bra010235	U
A08	UGM1881a	12.7	Genic SSR	At4g31290	Bra010245	U
A08	BrgMS859	12.9	Genomic SSR	At4g27652	Bra010395	U
A08	BrgMS269	12.9	Genomic SSR	At4g27470	Bra010403	U
A08	UGM0937	16.5	Genic SSR	At4g26850	Bra010424	U
A08	BrgMS522	17.3	Genomic SSR	At4g36810	Bra010576	U
A08	At4g28200	17.4	IP	At4g28200	Bra010382	U
A08	At4g26840a	17.4	IP	At4g26840	Bra010425	U
A08	UGM0666	17.7	Genic SSR	At4g26760	Bra010428	U
A08	UGM2285	17.9326	Genic SSR	At4g26060	Bra010442	U
A08	BrgMS101	18.3	Genomic SSR	-	Bra010551	U
A08	BrgMS183	19.0178	Genomic SSR	-	Bra034614	U
A08	At4g38470b	20.0714	IP	At4g38470	Bra010744	U
A08	At4g25140a	20.1	IP	At4g25140	Bra010474	U
A08	UGM0037	20.3	Genic SSR	At4g25660	-	U
A08	cnu_m239a	20.3	Genomic SSR	At4g25470	Bra010460	U
A08	At4g24550a	22	IP	At4g24550	Bra010489	U
A08	e48m34h182	22.1	AFLP	-	-	-
A08	UGM2173a	22.1961	Genic SSR	At4g25515	Bra010458	U
A08	At4g24550-010489a	22.2	IP	At4g24550	Bra010489	U
A08	BrgMS104	22.7	Genomic SSR	At4g37970	Bra010625	U
A08	BrgMS550	23.5	Genomic SSR	At4g38100	Bra010636	U
A08	UGM0825	23.9791	Genic SSR	At4g39680	Bra010668	U
A08	UGM1434	25.2194	Genic SSR	-	-	-
A08	UGM1320	25.9946	Genic SSR	At4g39680	Bra010668	U
A08	At1g28560b	27.7	IP	At1g28560	Bra010859	B
A08	BJ_VH_0180	27.8	SNP	At4g14300	Bra010757	T
A08	BJ_VH_0984	28	SNP	At4g38600	Bra010737	U
A08	cnu_m164a	27.9268	Genomic SSR	At1g26780	Bra016285	B
A08	cnu_m463a	28.0465	Genomic SSR	At1g25530	Bra011000	B
A08	At1g28530b	28.3	IP	At1g28530	Bra010863	B
A08	BJ_VH_0183	28.5	SNP	At1g28200	Bra010897	B
A08	cnu_m583a	28.7045	Genomic SSR	-	-	-
A08	cnu_m079a	28.82	Genomic SSR	-	Bra016317	B
A08	cnu_m584a	28.8242	Genomic SSR	At1g23770	Bra016332	B
A08	cnu_m281a	28.884	Genomic SSR	-	Bra016333	B
A08	cnu_m329a	28.884	Genomic SSR	At1g26730	Bra016284	B
A08	cnu_m177a	28.916	Genomic SSR	-	-	-
A08	UGM1492	29.076	Genic SSR	At1g24310	Bra010959	B
A08	cnu_m282a	29.3	Genomic SSR	At1g23770	Bra016332	B
A08	BrgMS844	30.2	Genomic SSR	At4g39370	Bra010687	U
A08	cnu_m336a	32.266	Genomic SSR	At1g21900	Bra016401	B
A08	UGM1475	32.9638	Genic SSR	At1g21590	Bra016415	B
A08	At1g24310	33	IP	At1g24310	Bra010959	B
A08	BrgMS489	33.2	Genomic SSR	At1g27450	Bra010937	B
A08	p62m39v124	33.9	AFLP	-	-	-
A08	UGM1939	34.6213	Genic SSR	At1g20670	Bra016456	B
A08	UGM2148	34.883	Genic SSR	At1g20650	Bra016457	B
A08	UGM1622	35.4936	Genic SSR	At1g19870	Bra016490	B
A08	UGM2222	36.8021	Genic SSR	At1g18470	Bra016557	A
A08	At1g26850	37	IP	At1g26850	Bra016293	B
A08	BJ_VH_0184	37.1	SNP	-	-	-
A08	At1g25540	37.2	IP	At1g25540	Bra011001	B
A08	e50t66h248	37.2	AFLP	-	-	-
A08	Bra034922	37.5	IP	-	Bra034922	-
A08	At1g23180a	37.8	IP	At1g23180	Bra016358	B
A08	BJ_VH_0964	37.9	SNP	At1g22740	Bra016372	B
A08	BJ_VH_0278	37.9	SNP	-	-	-
A08	At1G23820	38	IP	At1g23820	Bra016329	B
A08	cnu_m060a	38.2	Genomic SSR	At1g19640	Bra016498	B
A08	UGM0231	38.6	Genic SSR	-	-	-
A08	Bra016411	39	IP	-	Bra016411	B
A08	At1G21070	39.04	IP	At1g21070	Bra016435	B
A08	e39m50v470	39.4	AFLP	-	-	-
A08	BJ_VH_0956	40.8	SNP	At1g19150	Bra016522	A
A08	At1g18340a	41.6	IP	At1g18340	-	A
A08	UGM1077	41.7509	Genic SSR	At1g12830	Bra016753	A
A08	UGM0490	42.4309	Genic SSR	-	-	-
A08	At1g18060	42.6	IP	At1g18060	-	A
A08	BJ_VH_0957	42.8	SNP	At1g17690	Bra016592	A
A08	nia_m050a	46.5	Genomic SSR	At1g09020	Bra030752	A
A08	BrgMS498b	47.5	Genomic SSR	-	-	-
A08	At1g16920c	47.61	IP	At1g16920	Bra016624	A
A08	e60t65v148	48.1	AFLP	-	-	-
A08	UGM0529	49.1	Genic SSR	At1g13280	Bra016735	A
A08	BJ_VH_0958	49.9	SNP	At1g12570	Bra016766	A
A08	At1g11880c	50.8	IP	At1g11880	Bra016807	A
A08	BJ_VH_0280	51.4	SNP	At1g11760	Bra016814	A
A08	BJ_VH_0959	51.4	SNP	At1g11820	Bra016812	A
A08	e39t74h760	53.3	AFLP	-	-	-
A08	At1g11240	55.2	IP	At1g11240	Bra016847	A
A08	At1g09760a	55.4844	IP	At1g09760	Bra030797	A
A08	BJ_VH_0806	55.9	SNP	At1g10550	-	A
A08	BJ_VH_1174	55.9	SNP	At1g10090	-	A
A08	p65t76d125	56.3911	AFLP	-	-	-
A08	BrgMS66	57.6	Genomic SSR	-	-	-
A08	At1g08480	57.7697	IP	At1g08480	Bra030729	A
A08	e48t78v400	58.3	AFLP	-	-	-
A08	BJ_VH_0384	59.4	SNP	At1g06240	Bra030644	A
A08	UGM0370	60.5489	Genic SSR	At1g06900	Bra030665	A
A08	BJ_VH_0961	61.2	SNP	At1g03830	Bra030544	A
A08	At1g03180b	61.2	IP	At1g03180	-	A
A08	p48t87v295	63.9	AFLP	-	-	-
A09	cnu_m125a	0	Genomic SSR	-	-	-
A09	cnu_m530a	0.50802	Genomic SSR	At4g01100	Bra037383	O
A09	At4g03280a	0.880889	IP	At4g03280	Bra034200	O
A09	At4g03050b	2.7	IP	At4g03050	-	O
A09	At4g02580a	3.6	IP	At4g02580	-	O
A09	At4g03150a	3.6	IP	At4g03150	Bra034190	O
A09	UGM2230	3.86154	Genic SSR	At4g02725	Bra036243	O
A09	BJ_VH_1054	4.1	SNP	At4g01960	Bra036302	O
A09	At3g28180	4.10302	IP	At3g28180	Bra039061	L
A09	BJ_VH_0647	4.2	SNP	At4g03030	Bra034179	O
A09	At3g32930	4.8306	IP	At3g32930	Bra036195	L
A09	BrgMS725	5.45423	Genomic SSR	At5g48240	Bra036181	W
A09	BJ_VH_1068	6.8	SNP	At5g48460	Bra036170	V
A09	BJ_VH_0428	8.3	SNP	At5g28830	Bra036127	Q
A09	At5g27210	8.4	IP	At5g27210	Bra036108	Q
A09	At2g07440a	9.2	IP	At2g07440	-	G
A09	At5g27560	9.3	IP	At5g27560	Bra036622	Q
A09	BJ_VH_00090	9.5	SNP	At5g27650	Bra036620	Q
A09	At5g26210b	10.4	IP	At5g26210	Bra036568	Q
A09	At5g25610b	11.1	IP	At5g25610	Bra036546	Q
A09	UGM1613	11.3978	Genic SSR	At5g25150	Bra036534	Q
A09	BrgMS715	11.6	Genomic SSR	At5g25630	Bra036548	Q
A09	cnu_m607a	11.6	Genomic SSR	At5g26230	Bra036571	Q
A09	BJ_VH_00088	11.9	SNP	At5g25630	Bra036548	Q
A09	At5g24930a	12.1	IP	At5g24930	Bra036528	Q
A09	BJ_VH_00087	12.5	SNP	-	Bra036539	-
A09	At5g24490a	12.9	IP	At5g24490	Bra036518	Q
A09	UGM1679	14.4526	Genic SSR	-	-	-
A09	UGM1002	15.3842	Genic SSR	-	Bra035960	X
A09	e34m43h360	15.7	AFLP	-	-	-
A09	UGM1208	17.7132	Genic SSR	At5g61670	Bra035916	X
A09	BJ_VH_1070	17.8	SNP	At5g61150	Bra035940	X
A09	At5g61420b	18.2	IP	At5g61420	Bra035929	X
A09	BJ_VH_00079	18.4	SNP	At5g61670	Bra035916	X
A09	BJ_VH_00080	18.6	SNP	At5g61510	Bra035926	X
A09	nia_m087a	18.8	Genomic SSR	At5g66770	-	X
A09	BJ_VH_0427	19	SNP	At5g61760	Bra035915	X
A09	UGM0938	19.6095	Genic SSR	-	Bra035876	X
A09	UGM1190b	20.581	Genic SSR	-	-	-
A09	BJ_VH_00097	21.2	SNP	At5g63610	Bra037748	X
A09	BJ_VH_00075	21.2	SNP	At5g63410	Bra035846	X
A09	BJ_VH_00077	21.3	SNP	At5g63040	Bra035866	X
A09	e31m60h440	21.6	AFLP	-	-	-
A09	At5g63905	22	IP	At5g63905	-	X
A09	BJ_VH_00098	22	SNP	At5g64090	Bra037762	X
A09	Na10-B11	23.1556	Genomic SSR	-	-	-
A09	BJ_VH_00099	25.2	SNP	At5g64600	Bra037783	X
A09	BJ_VH_00102	27.3	SNP	At5g64860	Bra037799	X
A09	BJ_VH_1169	27.3	SNP	At5g65000	Bra037803	X
A09	BJ_VH_00104	27.7	SNP	At5g64920	Bra037800	X
A09	At5g67590	28.7	IP	At5g67590	Bra037836	X
A09	UGM1532	28.8381	Genic SSR	At5g67440	Bra037846	X
A09	e58m44v202	29.4	AFLP	-	-	-
A09	UGM0144	32.0698	Genic SSR	At5g42350	Bra027978	V
A09	BrgMS395	32.4	Genomic SSR	At5g64700	Bra037791	X
A09	BJ_VH_0449	34.6	SNP	-	Bra037174	-
A09	BJ_VH_1131	35.1	SNP	At2g15680	-	H
A09	At2g16660	35.3	IP	At2g16660	Bra037294	H
A09	At2g14255	35.4	IP	At2g14255	Bra037215	G
A09	At2g14170	35.7	IP	At2g14170	Bra037214	G
A09	At2G17190	35.8	IP	At2g17190	Bra037281	H
A09	At2g13360	35.9486	IP	At2g13360	Bra037207	G
A09	p63t78d238	36.3	AFLP	-	-	-
A09	At2G19260	38.0186	IP	At2g19260	Bra036726	H
A09	p33t83v197	38.7	AFLP	-	-	-
A09	UGM2071	39.2821	Genic SSR	At2g19440	Bra036718	H
A09	At2g17420b	39.3	IP	At2g17420	Bra037274	H
A09	BJ_VH_1022	41	SNP	At2g17670	Bra037262	H
A09	cnu_m615a	42.18	Genomic SSR	At2g20340	Bra036684	H
A09	At2g19260b	42.9	IP	At2g19260	Bra036726	H
A09	At2g19450b	43.3	IP	At2g19450	Bra036722	H
A09	cnu_m021a	43.7045	Genomic SSR	At1g62710	Bra036650	D
A09	At2g19450-036722a	44.7	IP	At2g19450	Bra036722	H
A09	cnu_m333a	44.965	Genomic SSR	At2g20310	Bra036686	H
A09	At2g20610	45.26	IP	At2g20610	Bra036703	H
A09	BJ_VH_1021	45.8	SNP	At2g19440	Bra036718	H
A09	e54t71d409	46.1182	AFLP	-	-	-
A09	UGM1699a	46.4065	Genic SSR	-	-	-
A09	e50t66v251	47.4	AFLP	-	-	-
A09	cnu_m157a	47.5677	Genomic SSR	-	-	-
A09	cnu_m170a	48.6	Genomic SSR	At2g18730	Bra038549	H
A09	cnu_m026a-2	48.6769	Genomic SSR	-	-	-
A09	cnu_m004a	48.8	Genomic SSR	At1g62660	Bra036653	D
A09	At1g63980a	48.8	IP	At1g63980	Bra027673	D
A09	At2g20320b	49.1	IP	At2g20320	Bra036685	H
A09	BrgMS631	49.2	Genomic SSR	At1g63420	Bra027639	D
A09	BJ_VH_1016	49.5	SNP	At1g63680	Bra027655	D
A09	BJ_VH_1145	49.8	SNP	At1g63830	Bra027663	D
A09	BJ_VH_0989	50.6	SNP	At1g64385	Bra027698	D
A09	UGM2092	53.5	Genic SSR	-	-	-
A09	UGM0738	53.8	Genic SSR	At5g42820	Bra027459	V
A09	BJ_VH_0365	54.1	SNP	At5g43050	Bra027471	V
A09	e31m50t340	54.4639	AFLP	-	-	-
A09	e34m62h102	54.6	AFLP	-	-	-
A09	At1g57680	55.2	IP	At1g57680	Bra027893	D
A09	BJ_VH_0115	55.5	SNP	At5g61760	Bra035915	X
A09	BJ_VH_1008	55.7	SNP	At1g29900	Bra032344	B
A09	BJ_VH_0390	55.9	SNP	At1g30540	Bra032400	B
A09	At1g64510b	56.5979	IP	At1g64510	Bra027704	D
A09	At1g63660	57.167	IP	At1g63660	Bra027795	D
A09	BJ_VH_1011	57.7	SNP	At1g62850	Bra027013	D
A09	UGM0485b	58.2	Genic SSR	-	-	-
A09	Bra027810	58.4474	IP	-	Bra027810	D
A09	BJ_VH_1013	58.5	SNP	At1g62730	Bra027023	D
A09	NiES28-2	58.5796	Genic SSR	-	-	-
A09	Bra027011	58.8	IP	-	Bra027011	D
A09	At1g62640	58.8	IP	At1g62640	Bra027031	D
A09	UGM0482	59	Genic SSR	At1g62500	Bra027040	D
A09	UGM1136	59.4	Genic SSR	At1g63100	Bra026999	D
A09	nia_m072a-1	60.1	Genomic SSR	At5g47620	Bra017475	V
A09	UGM1484	60.2	Genic SSR	-	-	-
A09	e31m58d285	60.4392	AFLP	-	-	-
A09	e39m50t97	61.0082	AFLP	-	-	-
A09	BrgMS185	61.5	Genomic SSR	-	-	-
A09	At1g60430a	61.8619	IP	At1g60430	-	D
A09	UGM1973	62.2	Genic SSR	At5g43270	Bra027478	V
A09	BJ_VH_1065	62.5	SNP	At5g45710	Bra017595	V
A09	BJ_VH_0991	62.5	SNP	-	Bra027964	-
A09	At5g42800a	62.7	IP	At5g42800	Bra027457	V
A09	At5g42320	62.8577	IP	At5g42320	Bra027976	V
A09	p87t77h282	63	AFLP	-	Bra026843	-
A09	At5g43430	63	IP	At5g43430	-	V
A09	UGM1783	63.3547	Genic SSR	At5g43320	Bra027483	V
A09	UGM0187	63.7939	Genic SSR	At4g05060	Bra029550	O
A09	UGM1977	63.8868	Genic SSR	At5g44560	Bra027559	V
A09	BJ_VH_0618	64	SNP	At2g03270	Bra017392	K
A09	BJ_VH_0344	64.1	SNP	At1g23640	Bra024610	B
A09	At3G27650	64.2	IP	At3g27650	Bra039072	L
A09	BJ_VH_0977	64.4	SNP	At4g11410	Bra035220	P
A09	e46m59t85	64.5667	AFLP	-	-	-
A09	e48m39v773	64.8	AFLP	-	-	-
A09	UGM0004	65.1283	Genic SSR	-	-	-
A09	BJ_VH_1064	65.2	SNP	At4g10130	Bra037908	P
A09	BJ_VH_1063	65.2	SNP	At4g10110	Bra037907	P
A09	BJ_EJ_0072	65.2	SNP	At4g10090	Bra037902	P
A09	BJ_EJ_0073	65.2	SNP	At4g10090	Bra037902	P
A09	BJ_VH_1051	65.2	SNP	At4g04040	Bra029482	O
A09	BJ_VH_1007	65.3	SNP	At1g26650	Bra024700	B
A09	e48t78h140	65.4	AFLP	-	-	-
A09	UGM1912	65.5717	Genic SSR	-	-	-
A09	e31m60t260	65.6111	AFLP	-	-	-
A09	cnu_m568a	65.8	Genomic SSR	At1g31350	Bra023181	B
A09	At1g27385	66	IP	At1g27385	Bra032825	B
A09	At4g09760	66.2	IP	At4g09760	Bra038369	P
A09	At1g28100	66.4	IP	At1g28100	Bra032874	B
A09	BrgMS639	66.6	Genomic SSR	At1g32700	Bra023280	B
A09	BJ_VH_0323	66.8	SNP	At1g31870	-	B
A09	BJ_VH_0387	66.8	SNP	At1g29980	Bra032349	B
A09	BJ_VH_0401	66.8	SNP	-	-	-
A09	BJ_VH_0321	66.9	SNP	At1g31920	-	B
A09	BJ_VH_1005	66.9	SNP	At1g31470	Bra023189	B
A09	BJ_VH_0386	66.9	SNP	At1g29220	Bra032297	B
A09	BJ_VH_0400	67	SNP	At1g27680	Bra032842	B
A09	BJ_VH_0388	67	SNP	At1g30090	Bra032358	B
A09	BJ_VH_0369	67.1	SNP	-	-	-
A09	BJ_VH_0372	67.3	SNP	At1g34340	Bra028051	B
A09	BJ_VH_0324	67.3	SNP	At1g31820	Bra023210	B
A09	BJ_VH_1006	67.4	SNP	At1g32860	Bra023293	B
A09	At1g34270-028047a	67.5	IP	At1g34270	Bra028047	B
A09	BJ_VH_0326	67.5	SNP	At1g32530	Bra023274	B
A09	UGM1826	67.5226	Genic SSR	-	-	-
A09	BJ_VH_0371	67.6	SNP	At1g33780	Bra028012	B
A09	At1G34550	67.7	IP	At1g34550	Bra028058	B
A09	p32t77h400	67.7	AFLP	-	-	-
A09	e34m62v309	67.7	AFLP	-	-	-
A09	p48t67v145	67.7	AFLP	-	-	-
A09	e44m38v425	67.7	AFLP	-	-	-
A09	At4g09060	67.7	IP	At4g09060	Bra038387	P
A09	At4g10100	67.7	IP	At4g10100	Bra037905	P
A09	At1g34380	67.7	IP	At1g34380	Bra028055	B
A09	At1g35340	67.7	IP	At1g35340	Bra028069	B
A09	At1g35460a	67.7	IP	At1g35460	-	B
A09	e55t73v440	67.7	AFLP	-	-	-
A09	e35t63v93	67.7	AFLP	-	-	-
A09	At1g34350	67.8	IP	At1g34350	Bra028052	B
A09	At1g31812c	67.8	IP	At1g31812c	Bra023206	B
A09	e43m50t174	67.85	AFLP	-	-	-
A09	nia_m128a-2	67.925	Genomic SSR	-	Bra032811	B
A09	BrgMS300	67.975	Genomic SSR	At1g33590	Bra028006	B
A09	BJ_VH_0325	68	SNP	At1g32130	Bra023242	B
A09	At1g33265	68	IP	At1g33265	Bra027988	B
A09	p48t94h390	68.1	AFLP	-	-	-
A09	At1g33980	68.1	IP	At1g33980	Bra028017	B
A09	At1g29990a	68.1	IP	At1g29990	Bra032350	B
A09	Na10-A08	68.1	Genomic SSR	-	-	-
A09	e54t69d175	68.1	AFLP	-	-	-
A09	p87t77t95	68.175	AFLP	-	-	-
A09	p87t77v205	68.175	AFLP	-	-	-
A09	At1G32460	68.2	IP	At1g32460	Bra023269	B
A09	e31m50d339	68.2	AFLP	-	-	-
A09	e31m50d343	68.2	AFLP	-	-	-
A09	e31m61d110	68.225	AFLP	-	-	-
A09	e34m49d430	68.225	AFLP	-	-	-
A09	UGM0130	68.3	Genic SSR	-	-	-
A09	UGM1642	68.3	Genic SSR	-	-	-
A09	p53t82d340	68.35	AFLP	-	-	-
A09	e50t66d200	68.375	AFLP	-	-	-
A09	e31m49v191	68.4	AFLP	-	-	-
A09	e55t63v118	68.4	AFLP	-	-	-
A09	p58t68t180	68.4	AFLP	-	-	-
A09	BJ_VH_1158	68.7	SNP	At1g31470	Bra023189	B
A09	BJ_VH_0319	68.7	SNP	At1g32130	Bra023242	B
A09	BrgMS469	68.9	Genomic SSR	At5g47380	Bra017488	V
A09	p58t68d240	69.06	AFLP	-	-	-
A09	At1g30880-023150a	69.1	IP	At1g30880	Bra023150	B
A09	BrgMS358b	69.2	Genomic SSR	-	-	-
A09	UGM0824a	69.35	Genic SSR	At1g31970	Bra023227	B
A09	UGM0630	69.5	Genic SSR	At1g34430	Bra028057	B
A09	nia_m026a	69.8	Genomic SSR	-	-	-
A09	At2g04030	69.8812	IP	At2g04030	Bra017360	K
A09	cnu_m391a	70.3683	Genomic SSR	-	-	-
A09	UGM0021	70.7	Genic SSR	-	-	-
A09	e31m58v289	70.8	AFLP	-	-	-
A09	p48t67h318	71.7	AFLP	-	-	-
A09	UGM2216	71.75	Genic SSR	At1g31850	Bra023213	B
A09	nia_m127a	71.9	Genomic SSR	At1g27385	Bra032825	B
A09	BrgMS695	72.0732	Genomic SSR	At1g30570	Bra032404	B
A09	BJ_VH_0346	72.2	SNP	At1g25580	Bra024733	B
A09	BJ_VH_0399	72.2	SNP	At1g24610	Bra032788	B
A09	e50t67t140	72.6409	AFLP	-	-	-
A09	UGM0646	72.8	Genic SSR	At1g29350	-	B
A09	Ni4-C09	73.3	Genomic SSR	-	-	-
A09	UGM1872	73.3231	Genic SSR	At1g25520	Bra024740	B
A09	UGM1148	73.4538	Genic SSR	-	-	-
A09	BJ_VH_0345	73.7	SNP	At1g26761	Bra024687	B
A09	UGM1963	73.7154	Genic SSR	At1g26570	Bra024708	B
A09	e34m62t120	74	AFLP	-	-	-
A09	p58t68d259	74.8364	AFLP	-	-	-
A09	BJ_VH_0342	75.2	SNP	At1g23400	Bra024597	B
A09	At1g22860	75.8077	IP	At1g22860	Bra024543	B
A09	At1g31410	76.1955	IP	At1g31410	-	B
A09	BrgMS670	76.2	Genomic SSR	-	-	-
A09	UGM0411	76.6	Genic SSR	At1g17070	Bra026691	A
A09	UGM1593	76.9059	Genic SSR	At1g22020	Bra031359	B
A09	UGM1093	77.2882	Genic SSR	-	-	-
A09	BJ_VH_0341	77.3	SNP	At1g22860	Bra024543	B
A09	UGM0322	77.534	Genic SSR	At3g49845	Bra036034	M
A09	At3g43520	77.6	IP	At3g43520	-	M
A09	At3g51130b	77.6	IP	At3g51130	Bra036835	N
A09	cnu_m402a-1	77.9	Genomic SSR	At3g50590	Bra036092	N
A09	BJ_VH_0994	78	SNP	At3g50910	Bra036850	N
A09	UGM2096	78.1827	Genic SSR	-	-	-
A09	At3g51010a	78.2864	IP	At3g51010	Bra036840	N
A09	At3g51260a	78.6	IP	At3g51260	Bra036824	N
A09	BJ_VH_1050	78.9	SNP	At3g51010	Bra036840	N
A09	UGM0073	80.1615	Genic SSR	-	-	-
A09	e39m32t390	80.26	AFLP	-	-	-
A09	BJ_VH_1032	80.3	SNP	At3g52190	Bra006909	N
A09	BJ_VH_1049	80.3	SNP	At3g51480	Bra036795	N
A09	BJ_VH_0993	80.4	SNP	-	Bra036805	-
A09	UGM0445	81.8577	Genic SSR	-	-	-
A09	cnu_m581a	83.4	Genomic SSR	-	Bra006982	-
A09	cnu_m484a	83.8	Genomic SSR	-	Bra036080	-
A09	UGM1011	83.8365	Genic SSR	-	-	-
A09	p58m71v952	84.2	AFLP	-	-	-
A09	p48t94t85	84.5286	AFLP	-	-	-
A09	BJ_VH_1035	84.7	SNP	At3g53350	Bra006992	N
A09	BJ_VH_1036	84.8	SNP	At3g53440	Bra006999	N
A09	BJ_EJ_0030	86.6	SNP	At3g54670	Bra007088	N
A09	e44m38v214	86.9	AFLP	-	-	-
A09	UGM0048	87.158	Genic SSR	-	-	-
A09	BrgMS818	88.2	Genomic SSR	At3g51840	Bra006879	N
A09	BJ_VH_1038	88.7	SNP	At3g55660	Bra007183	N
A09	UGM2260a	88.925	Genic SSR	-	-	-
A09	At3g55430a	89.2	IP	At3g55430	Bra007161	N
A09	cnu_m280a	89.6966	Genomic SSR	At3g53450	Bra007000	N
A09	BJ_VH_1041	90.8	SNP	At3g57000	Bra007292	N
A09	BrgMS457b	91.0452	Genomic SSR	-	-	-
A09	e34m62v390	92.4	AFLP	-	-	-
A09	cnu_m296a	92.6	Genomic SSR	At3g59360	Bra007445	N
A09	BJ_VH_0151	93.2	SNP	At3g58470	Bra007395	N
A09	At3g58500b	93.2	IP	At3g58500	Bra007398	N
A09	e55t63h113	93.3	AFLP	-	-	-
A09	BJ_VH_0152	93.5	SNP	At4g34220	-	U
A09	BJ_VH_1042	94.1	SNP	At3g57090	Bra007301	N
A09	At3g60810a	95.6116	IP	At3g60810	Bra007564	N
A09	BJ_VH_1044	96	SNP	At3g58970	Bra007423	N
A09	At3g59490	96.5	IP	At3g59490	Bra007454	N
A09	BrgMS3322	96.5	Genomic SSR	At3g55646	Bra007182	N
A09	BJ_VH_1045	96.8	SNP	At3g59060	Bra007430	N
A09	BJ_VH_1024	100.3	SNP	At2g26540	Bra007749	I
A09	At3g62620	100.5	IP	At3g62620	Bra007688	N
A09	e46m59h132	100.6	AFLP	-	-	-
A09	At2g26350	100.7	IP	At2g26350	Bra007757	I
A09	e34m43v310	100.8	AFLP	-	-	-
A09	At2g25740b	100.8	IP	At2g25740	Bra007779	I
A09	At2g26470	100.9	IP	At2g26470	Bra007753	I
A09	BJ_VH_0153	101	SNP	At3g63120	Bra007729	N
A09	UGM1291	102.156	Genic SSR	At2g25620	Bra007784	I
A09	UGM0071	102.3	Genic SSR	-	-	-
A09	cnu_m465a	102.453	Genomic SSR	At2g21660	Bra031210	I
A09	At2g22370	103.13	IP	At2g22370	Bra038531	I
A09	UGM2008	103.567	Genic SSR	-	-	-
A09	e44m38d360	104.451	AFLP	-	-	-
A09	At2g21120	104.662	IP	At2g21120	Bra031164	H
A09	UGM1041	104.9	Genic SSR	-	-	-
A09	At2g20585	105.93	IP	At2g20585	Bra031130	H
A09	At1g18730a	106.089	IP	At1g18730	Bra031047	A
A09	At2g20490b	106.3	IP	At2g20490	Bra036676	H
A09	p53m47h350	107.7	AFLP	-	-	-
A09	BJ_VH_1019	108.2	SNP	At2g20860	Bra031143	H
A09	UGM1821	108.411	Genic SSR	-	-	-
A09	BJ_VH_1026	108.5	SNP	At2g21250	Bra031177	I
A09	UGM0454	108.918	Genic SSR	-	-	-
A09	At1g16920a	109.433	IP	At1g16920	Bra026698	A
A09	At1g16190	110.1	IP	At1g16190	Bra026728	A
A09	At1g16310b	110.2	IP	At1g16310	Bra026723	A
A09	UGM0628c	111.6	Genic SSR	At1g15950	Bra026737	A
A09	At1g15390	112.7	IP	At1g15390	Bra026766	A
A09	BJ_VH_0996	112.8	SNP	At1g15530	Bra026758	A
A09	At1g15950	113.146	IP	At1g15950	Bra026737	A
A09	p63t71h213	114	AFLP	-	-	-
A09	UGM0733	114.352	Genic SSR	At1g15950	Bra026737	A
A09	BrgMS823	114.9	Genomic SSR	At1g13870	Bra026877	A
A09	e46m59v304	116	AFLP	-	-	-
A09	UGM0007	116.4	Genic SSR	-	-	-
A09	UGM0082	117.168	Genic SSR	At1g01730	Bra032648	A
A09	BrgMS4495	119.231	Genomic SSR	At1g18470	Bra031030	A
A09	UGM1433	119.606	Genic SSR	At1g13020	Bra026941	A
A09	BJ_VH_1000	121.6	SNP	At1g11650	Bra031774	A
A09	BJ_VH_1001	121.9	SNP	At1g11800	Bra031783	A
A09	At1g11880b	122	IP	At1g11880	Bra031787	A
A09	BrgMS808	123.183	Genomic SSR	At1g15860	Bra026742	A
A09	BrgMS112	123.619	Genomic SSR	-	-	-
A09	e48t78h132	124.8	AFLP	-	-	-
A09	cnu_m025a	125.362	Genomic SSR	At1g14210	Bra026846	A
A09	At1g07980b	125.5	IP	At1g07980	Bra031606	A
A09	At1g07210	125.7	IP	At1g07210	Bra031557	A
A09	e62t65d185	125.736	AFLP	-	-	-
A09	BJ_VH_0998	125.8	SNP	At1g08860	Bra031645	A
A09	At1g05205b	125.9	IP	At1g05205	Bra032479	A
A09	cnu_m587a	126.776	Genomic SSR	-	Bra026845	A
A09	nia_m132a	128.6	Genomic SSR	-	-	-
A09	e44m39h214	128.9	AFLP	-	-	-
A09	UGM1049	129.341	Genic SSR	At1g06230	Bra032431	A
A09	p53t91d340	129.721	AFLP	-	-	-
A09	e50t67h113	130.966	AFLP	-	-	-
A09	At1g04750	130.966	IP	At1g04750	Bra032493	A
A09	UGM2132b	131.173	Genic SSR	At1g04550	Bra032503	A
A09	UGM0770a	132.089	Genic SSR	At1g04300	Bra032518	A
A09	At1g03687	133.3	IP	At1g03687	Bra032546	A
A09	At1g01290	133.5	IP	At1g01290	Bra032632	A
A09	BJ_EJ_0067	133.6	SNP	-	-	-
A09	BJ_VH_1004	133.6	SNP	At1g03687	Bra032546	A
A09	p48t94h261	133.7	AFLP	-	-	-
A09	UGM0094	133.7	Genic SSR	-	-	-
A09	UGM1554	134.723	Genic SSR	At1g02660	Bra032591	A
A09	At1G14710	142.299	IP	At1g14710	Bra026810	A
A10	UGM0681	0	Genic SSR	-	Bra033317	A
A10	e34m43h119	0.9	AFLP	-	-	-
A10	BJ_VH_1074	1.2	SNP	At1g01080	Bra033287	A
A10	BJ_VH_1081	1.2	SNP	At1g02640	Bra033337	A
A10	BrgMS334	1.2	Genomic SSR	At1g02820	Bra033350	A
A10	At1g02870	1.7	IP	At1g02870	Bra033354	A
A10	UGM1627b	1.97037	Genic SSR	At1g01790	Bra033232	A
A10	e50t66h372	3.2	AFLP	-	-	-
A10	BJ_VH_1075	4	SNP	At1g03970	Bra015281	A
A10	BJ_VH_1078	5.6	SNP	At1g05010	Bra015380	A
A10	BJ_VH_1076	5.7	SNP	At1g04970	Bra015371	A
A10	At1g04950	6	IP	At1g04950	Bra015368	A
A10	e45m34v225	6.8	AFLP	-	-	-
A10	e62t65v520	6.8	AFLP	-	-	-
A10	BJ_VH_0651	7.1	SNP	At5g51740	Bra028272	W
A10	e60t65h357	7.4	AFLP	-	-	-
A10	BJ_VH_1073	7.5	SNP	-	Bra015530	A
A10	Na12-E09	7.8	Genomic SSR	-	-	W
A10	e50m32h84	10.5	AFLP	-	-	-
A10	BJ_VH_1114	10.6	SNP	At5g57020	Bra002770	W
A10	BrgMS564b	12.7	Genomic SSR	At5g58670	Bra002627	W
A10	e39m50v415	13.8	AFLP	-	-	-
A10	At5g59140b	14	IP	At5g59140	Bra002588	W
A10	BJ_VH_1112	14.3	SNP	At5g59250	Bra002596	W
A10	Ra2-E03	14.7	Genomic SSR	-	-	-
A10	e60t65v275	15.5	AFLP	-	-	-
A10	BJ_VH_0122	16	SNP	At5g22320	Bra002405	R
A10	BJ_VH_0121	16	SNP	At5g22260	Bra002401	R
A10	BJ_VH_0120	16.7	SNP	At5g22210	Bra002397	R
A10	BJ_VH_1090	17.3	SNP	At5g21482	Bra002371	R
A10	p79t78d67	17.4929	AFLP	-	-	-
A10	p63t71d210	17.6869	AFLP	-	-	-
A10	nia_m144a	18.1	Genomic SSR	At5g21170	Bra002366	R
[truncated: 1,514 more rows]
